# Supplementary material for: Aryl ether-free polymer electrolytes for electrochemical and energy devices
Source: Royal Society of Chemistry journal article supplement (doi:10.1039/d3cs00186e), 2024-01-01
Supplement: d3cs00186e1.pdf [file d3cs00186e1.pdf]

Supplementary information

## **Aryl Ether-free Polymer Electrolytes for Electrochemical and Energy Devices**

**Eun Joo Park,<sup>a</sup> Patric Jannasch,<sup>b</sup> Kenji Miyatake,<sup>c,d</sup> Chulsung Bae,<sup>e</sup> Kevin Noonan,<sup>f</sup> Cy Fujimoto,<sup>g</sup> Steven Holdcroft,<sup>h</sup> John Varcoe,<sup>i</sup> Dirk Henkensmeier,<sup>j,k,l</sup> Michael D. Guiver,<sup>\*m</sup> Yu Seung Kim<sup>\*a</sup>**

<sup>a</sup> Los Alamos National Laboratory, Los Alamos, NM 87545, USA

<sup>b</sup> Lund University, SE-221 00 Lund, Sweden

<sup>c</sup> University of Yamanashi, Kofu 400-8510, Japan

<sup>d</sup> Waseda University, Tokyo 169-8555, Japan

<sup>e</sup> Rensselaer Polytechnic Institute, Troy, NY 12180, USA

<sup>f</sup> Carnegie Mellon University, Pittsburgh, PA 15213, USA

<sup>g</sup> Sandia National Laboratories, Albuquerque, NM 87123, USA

<sup>h</sup> Simon Fraser University, Burnaby, BC V5A 1S6, Canada

<sup>i</sup> University of Surrey, Guildford GU2 7XH, UK

<sup>j</sup> Korea Institute of Science and Technology (KIST), Seoul 02792, South Korea

<sup>k</sup> KIST School, Korea National University of Science and Technology (UST), Seoul 02792, South Korea

<sup>l</sup> KU-KIST School, Korea University, Seoul 02841, South Korea

<sup>m</sup> State Key Laboratory of Engines, Tianjin University, Tianjin 300072, China

\* To whom correspondence should be addressed.

E-mails: yskim@lanl.gov; michael.guiver@outlook.com

## Glossary of Acronyms

AEM: Anion exchange membrane  
AEMFC: Anion exchange membrane fuel cell  
AEMWE: Anion exchange membrane water electrolyzer  
Alkyl-A: Alkyl ammonium  
BTMA: Benzyltrimethyl ammonium  
CE: Coulombic efficiency  
CNT: Carbon nanotube  
DABCO: Diazabicyclo[2.2.2] octane  
DAPP: Diels–Alder polyphenylene  
EE: Energy efficiency  
ETFE: Ethylene tetrafluoroethylene  
FE: Faradaic efficiency  
FLN: Polyfluorene  
HDPE: High density polyethylene  
IEC: Ion exchange capacity  
Im: Imidazolium  
IPN: Interpenetrating polymer network  
LDPE: Low-density polyethylene  
MEA: Membrane electrode assembly  
OCV: Open circuit voltage  
QAPPT: Poly(*N*-methyl-piperidinium-*co-p*-terphenyl)  
PAE: Poly(arylene ether)  
PBI: Polybenzimidazole  
PE: Polyethylene  
PEEK: Poly(ether ether ketone)  
PES: Poly(ether sulfone)  
PGM: Platinum group metal  
Pip: Piperidinium  
PPD: Peak power density  
PPO: Poly(*p*-phenylene oxide)  
PTFE: Polytetrafluoroethylene  
PSf: Polysulfone  
Pyr: Pyridinium  
ROMP: Ring opening metathesis polymerization  
SEBS: Poly(styrene-*b*-(ethylene-*co*-butylene)-*b*-styrene)  
VE: Voltage efficiency  
WU: Water uptake

**Table S1.** H<sub>2</sub>/O<sub>2</sub> AEMFC performance of MEAs using aryl ether polyaromatic membranes.

| Year | Backbone         | Cation group        | X-linked or Composite | IEC (mequiv. g <sup>-1</sup> ) | WU (%) (°C) | $\sigma$ (mS cm <sup>-1</sup> ) (°C) | $t$ ( $\mu$ m) | Ionomer                 | PPD (W cm <sup>-2</sup> ) | Ref.          |
|------|------------------|---------------------|-----------------------|--------------------------------|-------------|--------------------------------------|----------------|-------------------------|---------------------------|---------------|
| 2015 | PES              | BTMA                | n/a                   | 1.0                            | 68 (80)     | 110 (80)                             | 50             | PES                     | 1.0                       | <sup>1</sup>  |
| 2018 | PEEK             | BTMA                | Composite             | 1.8                            | 95 (80)     | 119 (80)                             | 15             | PEEK                    | 0.93                      | <sup>2</sup>  |
| 2019 | PPO              | Benzyl-Im           | X-linked              | 1.7                            | 105 (25)    | 62 (80)                              | 50             | PPO-BTMA                | 1.02                      | <sup>3</sup>  |
| 2019 | PPO              | Phenyl piperazinium | n/a                   | 2.0                            | 88 (60)     | 108 (60)                             | 50             | PPO-Phenyl piperazinium | 1.21                      | <sup>4</sup>  |
| 2020 | PES              | BTMA                | X-linked              | 1.1                            | 53 (25)     | 30 (25)                              | 50             | PES                     | 0.61                      | <sup>5</sup>  |
| 2021 | PPO              | BTMA                | n/a                   | 1.5                            | 77 (80)     | 94 (80)                              | 90             | n/a                     | 0.51                      | <sup>6</sup>  |
| 2021 | PES              | N-spirocy           | n/a                   | 1.4                            | 25 (80)     | 136 (80)                             | 46             | PPO                     | 0.85                      | <sup>7</sup>  |
| 2021 | PES              | N-spirocy           | n/a                   | 1.7                            | 80 (25)     | 36 (80) <sup>a</sup>                 | 55             | ETFE-BTMA               | 1.48                      | <sup>8</sup>  |
| 2022 | PPO <sup>b</sup> | BTMA                | X-linked              | 2.2                            | 130 (20)    | 160 (80)                             | 20             | PPO                     | 0.58 <sup>c</sup>         | <sup>9</sup>  |
| 2022 | PPO              | BTMA                | X-linked              | 3.6                            | 147 (30)    | 52 (30)                              | 50             | Phenyl-Pip              | 0.58                      | <sup>10</sup> |

<sup>a</sup> Cl<sup>-</sup> form at 95% RH, <sup>b</sup> PPO/Olefinic IPN. <sup>c</sup> H<sub>2</sub>/CO<sub>2</sub>-free air.

**Table S2.** H<sub>2</sub>/O<sub>2</sub> AEMFC performance of MEAs using aryl ether-free polyaromatic membranes.

| AEM Synthesis  | Year | Cation group         | IEC (mequiv. g <sup>-1</sup> ) | WU (%) (°C) | $\sigma$ (mS cm <sup>-1</sup> ) (°C) | $t$ ( $\mu$ m) | Ionomer                 | PPD (W cm <sup>-2</sup> ) | Ref.   |
|----------------|------|----------------------|--------------------------------|-------------|--------------------------------------|----------------|-------------------------|---------------------------|--------|
| PBI            | 2016 | Im                   | 2.5                            | 55 (25)     | 10 (25)                              | 34             | PBI                     | 0.37                      | 11     |
| Metal-promoted | 2017 | BTMA                 | 2.1                            | 185 (30)    | 86 (80)                              | 50             | FLN                     | 0.52                      | 12     |
| Diels–Alder    | 2018 | Alkyl-A              | 2.0                            | 83 (30)     | 48 (30)                              | 30             | Polyphenyl              | 0.88                      | 13     |
| Acid-catalyzed | 2018 | Alkyl-A              | 2.2                            | 70 (80)     | 100 (80)                             | 30             | FLN                     | 1.50                      | 14     |
| Acid-catalyzed | 2018 | Phenyl-Pip           | 2.7                            | 58 (80)     | 137 (80)                             | 30             | Phenyl-Pip              | 1.50                      | 15     |
| Acid-catalyzed | 2019 | Phenyl-Pip           | 2.7                            | 58 (80)     | 137 (80)                             | 30             | Phenyl-Pip              | 1.90                      | 16     |
| Acid-catalyzed | 2019 | Phenyl-Pip           | 2.4                            | 90 (30)     | 193 (95)                             | 25             | Phenyl-Pip              | 1.89                      | 17, 18 |
| Acid-catalyzed | 2019 | Alkyl-A              | 1.2                            | 42 (80)     | 95 (80)                              | 36             | Piperidine-co-terphenyl | 1.20                      | 19     |
| Acid-catalyzed | 2019 | Alkyl-A              | 2.1                            | 70 (80)     | 112 (80)                             | 35             | Polybiphenyl            | 1.60                      | 20     |
| Acid-catalyzed | 2020 | Alkyl-A              | 2.2                            | 131 (80)    | 145 (80)                             | 25             | FLN                     | 0.56                      | 21     |
| Acid-catalyzed | 2020 | Alkyl-A              | 2.3                            | 76 (70)     | 125 (70)                             | 50             | Polycarbazole           | 1.61                      | 22     |
| Acid-catalyzed | 2021 | Phenyl & alkyl-Pip   | 1.9                            | 80 (80)     | 105 (80)                             | 45             | PPO                     | 1.18                      | 23     |
| PBI            | 2021 | Alkyl-A              | 3.1                            | 95 (80)     | 135 (80)                             | 10             | PBI                     | 1.16                      | 24     |
| Acid-catalyzed | 2021 | Phenyl-Pip           | 2.8                            | 180 (80)    | 138 (60)                             | 22             | FLN-Pip-co-Biphenyl-Pip | 2.58                      | 25     |
| Metal-promoted | 2021 | Alkyl-Pip            | 1.5                            | 75 (80)     | 95 (80)                              | n/a            | PPO                     | 0.56                      | 26     |
| Acid-catalyzed | 2022 | Alkyl-A              | 1.8                            | 69 (30)     | 123 (80)                             | 25             | Polybiphenyl            | 0.60                      | 27     |
| Acid-catalyzed | 2022 | Alkyl-Pyr            | 1.9                            | 27 (80)     | 120 (80)                             | 21             | FLN                     | 0.50                      | 28     |
| Acid-catalyzed | 2022 | Alkyl-A              | 1.9                            | 45 (30)     | 108 (80)                             | 30             | FLN                     | 0.92                      | 29     |
| PBI            | 2022 | Alkyl-Pip            | 2.0                            | 83 (80)     | 80 (80)                              | 20             | PBI                     | 0.79                      | 30     |
| Acid-catalyzed | 2022 | Phenyl-Pip           | 2.5                            | 35 (80)     | 121 (80)                             | 30             | Phenyl-                 | 1.20                      | 31     |
| PBI            | 2022 | Im                   | 2.9                            | 73 (30)     | n/a                                  | 5              | PBI                     | 1.40                      | 32     |
| Acid-catalyzed | 2022 | Phenyl-Pip           | 2.8                            | 55 (20)     | 205 (90)                             | 20             | Phenyl-Pip              | 1.72                      | 33     |
| Acid-catalyzed | 2022 | Alkyl-A              | 1.8                            | 69 (30)     | 155 (80)                             | 20             | Polycarbazole           | 1.85                      | 34     |
| Acid-catalyzed | 2022 | Phenyl-Pip           | 2.8                            | 136 (80)    | 138 (60)                             | 20             | Phenyl-Pip              | 2.30                      | 35     |
| Acid-catalyzed | 2023 | Alkyl-A              | 2.1                            | 112 (80)    | 152 (80)                             | n/a            | Polycarbazole           | 0.55                      | 36     |
| Acid-catalyzed | 2023 | Alkyl-A & phenyl-Pip | 3.0                            | 72 (80)     | 157 (80)                             | 25             | Phenyl-Pip              | 0.65                      | 37     |
| Acid-catalyzed | 2023 | Phenyl-Pip           | 2.4                            | 101 (30)    | 168 (80)                             | 28             | Phenyl-Pip              | 0.72                      | 38     |
| Acid-catalyzed | 2023 | Alkyl-A              | 1.7                            | 96 (80)     | 126 (80)                             | 35             | Phenyl-Pip              | 0.74                      | 39     |
| Acid-catalyzed | 2023 | Phenyl-Pip           | 2.8                            | 54 (80)     | 162 (80)                             | 8              | FLN-Pip-co-Biphenyl-Pip | 0.78                      | 40     |
| Acid-catalyzed | 2023 | Alkyl-A              | 2.4                            | 116 (80)    | 155 (80)                             | 40             | FLN                     | 0.84                      | 41     |
| Acid-catalyzed | 2023 | Phenyl-Pip           | 2.5                            | 10 (80)     | 143 (80)                             | 20             | Phenyl-Pip              | 0.85                      | 42     |
| Acid-catalyzed | 2023 | Alkyl-Pip            | 1.2                            | 36 (80)     | 82 (80)                              | 50             | Alkyl-Pip               | 1.00                      | 43     |
| Acid-catalyzed | 2023 | Alkyl-A              | 2.1                            | 45 (80)     | 180 (80)                             | 30             | FLN                     | 1.00                      | 44     |
| Acid-catalyzed | 2023 | Alkyl-A              | 1.4                            | 58 (80)     | 115 (80)                             | 17             | Phenyl-Pip              | 1.08                      | 45     |
| Metal-promoted | 2023 | Alkyl-A              | 2.5                            | 71 (80)     | 136 (80)                             | 24             | Polyphenyl              | 1.27                      | 46     |
| Acid-catalyzed | 2023 | Alkyl-A              | 2.3                            | 90 (80)     | 175 (80)                             | 30             | FLN                     | 1.33                      | 47     |
| Diels–Alder    | 2023 | Alkyl-A              | 2.0                            | 48 (30)     | 83 (80)                              | 25             | Norbornene              | 1.40                      | 48     |
| Acid-catalyzed | 2023 | Phenyl-Pip           | 2.5                            | 80 (80)     | 217 (80)                             | 25             | Phenyl-Pip              | 1.61                      | 49     |
| Acid-catalyzed | 2023 | Phenyl-Pip           | 2.7                            | 97 (80)     | 148 (80)                             | 20             | FLN-Pip-co-Biphenyl-Pip | 2.00                      | 50     |
| Acid-catalyzed | 2023 | Phenyl-Pip           | 3.1                            | 230 (25)    | 143 (80)                             | 20             | FLN-Pip-co-Biphenyl-Pip | 2.61                      | 51     |
| Acid-catalyzed | 2024 | Phenyl-Pip           | 2.8                            | 150 (80)    | 126 (80)                             | 20             | FLN-Pip-co-Biphenyl-Pip | 2.00                      | 52     |

**Table S3.** H<sub>2</sub>/O<sub>2</sub> AEMFC performance of MEAs using polyolefinic membranes.

| AEM Synthesis   | Year | Cation group   | IEC (mequiv. g <sup>-1</sup> ) | WU (%) (°C) | $\sigma$ (mS cm <sup>-1</sup> ) (°C) | $t$ ( $\mu$ m) | Ionomer     | PPD (W cm <sup>-2</sup> ) | Ref. |
|-----------------|------|----------------|--------------------------------|-------------|--------------------------------------|----------------|-------------|---------------------------|------|
| Radiation-graft | 2016 | BTMA           | 3.2                            | 285 (25)    | 10 (25)                              | 50             | PVBC        | 0.61                      | 53   |
| Radiation-graft | 2016 | Benzyl-Pyr     | 2.1                            | n/a         | n/a                                  | 52             | Polysulfone | 0.98                      | 54   |
| Vinyl           | 2017 | Phenyl-A       | 1.4                            | 42 (25)     | 35 (30)                              | 22             | SEBS        | 0.38                      | 55   |
| Radiation-graft | 2017 | BTMA           | 2.1                            | 57 (30)     | 68 (80) <sup>a</sup>                 | 25             | ETFE-BTMA   | 1.16                      | 56   |
| Radiation-graft | 2017 | BTMA           | 2.9                            | 105 (30)    | 76 (30) <sup>a</sup>                 | 25             | ETFE-BTMA   | 1.45                      | 57   |
| Anionic         | 2017 | BTMA           | 1.4                            | 52 (30)     | 112 (70)                             | 50             | PPO         | 0.30                      | 58   |
| Radiation-graft | 2018 | BTMA           | 2.5                            | 149 (30)    | 208 (80)                             | 22             | ETFE-BTMA   | 2.0                       | 59   |
| Vinyl           | 2019 | Alkyl-A        | 3.4                            | 69 (25)     | 198 (80)                             | 64             | Norbornene  | 0.51                      | 60   |
| Anionic         | 2019 | Alkyl-A        | 1.5                            | 28 (25)     | 65 (80)                              | 60             | FLN         | 0.52                      | 61   |
| Radiation-graft | 2019 | BTMA           | 2.4                            | 121 (25)    | 155 (25) <sup>a</sup>                | 21             | ETFE-BTMA   | 2.6                       | 62   |
| Vinyl           | 2019 | Alkyl-A        | 3.8                            | 73 (25)     | 152 (80)                             | 10             | ETFE-BTMA   | 3.5                       | 63   |
| Anionic         | 2020 | BTMA           | 1.4                            | 45 (30)     | 40 (60)                              | n/a            | SEBS        | 0.59                      | 64   |
| Vinyl           | 2020 | Alkyl-A        | 3.5                            | 73 (25)     | 147 (80)                             | 10             | Norbornene  | 3.2                       | 65   |
| Vinyl           | 2021 | Alkyl-Pyr      | 1.9                            | 588 (30)    | 100 (80)                             | 21             | PPO         | 1.1                       | 66   |
| Vinyl           | 2021 | BTMA           | 1.5                            | 98 (80)     | 116 (20)                             | 50             | PPO         | 0.64 <sup>b</sup>         | 67   |
| Vinyl           | 2022 | Benzyl-Pip     | 1.6                            | 9 (80)      | 102 (80)                             | 4              | Phenyl-Pip  | 1.00                      | 68   |
| Vinyl           | 2022 | Benzyl-Pip     | 1.9                            | 141 (25)    | 172 (80)                             | 35             | PPO         | 0.98                      | 69   |
| ROMP            | 2023 | Alkyl-cyclic A | 1.7                            | 87 (80)     | 67 (80)                              | n/a            | Phenyl-Pip  | 1.0                       | 70   |
| Vinyl           | 2023 | Alkyl-A        | 2.0                            | 71 (25)     | 109 (80)                             | 30             | FLN         | 1.07                      | 71   |
| Vinyl           | 2023 | Alkyl-Pyr      | 2.5                            | 75 (95)     | 130 (90)                             | 40             | Styrene     | 0.66                      | 72   |

<sup>a</sup> Cl<sup>-</sup> form. <sup>b</sup>H<sub>2</sub>/CO<sub>2</sub>-free air and PGM-free cathode.

**Table S4.** H<sub>2</sub>/CO<sub>2</sub>-free air AEMFC performance of aryl ether-free MEAs.

| Year | AEM backbone | Cation group | IEC (mequiv. g <sup>-1</sup> ) | $t$ ( $\mu$ m) | Cathode catalyst                           | Operating temp. (°C) | Ionomer     | PPD (W cm <sup>-2</sup> ) | Ref. |
|------|--------------|--------------|--------------------------------|----------------|--------------------------------------------|----------------------|-------------|---------------------------|------|
| 2017 | ETFE         | BTMA         | 2.1                            | 21             | Ag/C                                       | 70                   | ETFE-BTMA   | 0.65                      | 73   |
| 2018 | LDPE         | BTMA         | 2.5                            | 22             | Ag/C                                       | 80                   | ETFE-BTMA   | 0.66                      | 59   |
| 2019 | LDPE         | BTMA         | 2.9                            | 25             | N-C-CoO <sub>x</sub>                       | 65                   | ETFE-BTMA   | 0.66                      | 74   |
| 2019 | Phenyl-Pip   | Phenyl-Pip   | 2.4                            | 25             | Ag                                         | 95                   | Phenyl-Pip  | 0.92                      | 16   |
| 2021 | ETFE         | BTMA         | 2.1                            | 50             | Co-Fe/CNT                                  | 60                   | Polystyrene | 0.8                       | 75   |
| 2021 | HDPE         | BTMA         | 2.4                            | 20             | Fe-N-C                                     | 80                   | ETFE-BTMA   | 1.0                       | 76   |
| 2022 | Phenyl-Pip   | Phenyl-Pip   | 2.4                            | 18             | Ni-H <sub>2</sub> -NH <sub>3</sub> (anode) | 95                   | Phenyl-Pip  | 0.5                       | 77   |
| 2022 | Phenyl-Pip   | Phenyl-Pip   | 2.4                            | 15             | Zn-N-C                                     | 80                   | Phenyl-Pip  | 0.83                      | 78   |
| 2022 | Phenyl-Pip   | Phenyl-Pip   | n/a                            | 20             | Co-Mn-oxide                                | 80                   | Phenyl-Pip  | 0.83                      | 79   |
| 2023 | Phenyl-Pip   | BTMA         | n/a                            | 22             | Fe-N-C                                     | 85                   | Phenyl-Pip  | 0.51                      | 80   |
| 2023 | Phenyl-Pip   | Phenyl-Pip   | 2.7                            | 25             | Ni (anode)                                 | 80                   | Phenyl-Pip  | 0.55                      | 81   |
| 2023 | Phenyl-Pip   | Phenyl-Pip   | 2.4                            | 15             | Metal-free carbon                          | 80                   | Phenyl-Pip  | 0.60                      | 82   |

**Table S5.** AEMFC durability of MEAs using aryl ether polyaromatic membranes.

| Year | Back bone | Cation group     | IEC (mequiv. g <sup>-1</sup> ) | t (μm) | Ionomer   | PPD (W cm <sup>-2</sup> ) | AEMFC durability |                         |                  |          | Ref.          |
|------|-----------|------------------|--------------------------------|--------|-----------|---------------------------|------------------|-------------------------|------------------|----------|---------------|
|      |           |                  |                                |        |           |                           | Temp (°C)        | i (A cm <sup>-2</sup> ) | Time (h)         | Loss (%) |               |
| 2012 | PAE       | BTMA             | 2.7                            | 50     | PAE-BTMA  | 0.19                      | 60               | 0.3 V                   | 55               | > 70     | <sup>83</sup> |
| 2019 | PPO       | Benzyl-Im        | 1.7                            | 50     | PPO       | 1.02                      | 70               | 0.6                     | 58               | 29       | <sup>3</sup>  |
| 2020 | PPO       | Im               | 1.4                            | 25     | PPO       | 0.75                      | 60               | 0.2                     | 960              | 70       | <sup>84</sup> |
| 2021 | PPO       | BTMA             | 1.5                            | 90     | n/a       | 0.51                      | 60               | 0.2                     | 24               | 39       | <sup>6</sup>  |
| 2021 | PPO       | Alkyl-phenyl Pip | 2.0                            | 15     | PPO       | 1.5                       | 70               | 0.6                     | 120              | 14       | <sup>85</sup> |
| 2021 | PES       | N-spirocy        | 1.3                            | 10     | ETFE-BTMA | 1.1                       | 61               | 0.6                     | 550 <sup>a</sup> | 7        | <sup>8</sup>  |
| 2022 | PPO       | BTMA             | 2.3                            | n/a    | PPO       | 0.45                      | 60               | 0.3                     | 120              | 13       | <sup>86</sup> |
| 2023 | PES       | Pyr              | 1.8                            | n/a    | PES       | 0.49                      | 60               | 0.1                     | 10               | 14       | <sup>87</sup> |

<sup>a</sup>H<sub>2</sub>/CO<sub>2</sub>-free air, <sup>b</sup>PGM-free cathode, <sup>c</sup>Cl<sup>-</sup> form at 95% RH, <sup>d</sup>PPO/olefinic IPN.

**Table S6.** AEMFC durability of MEAs using aryl ether-free membranes.

| Year       | Backbone         | Cation group | IEC (meq uiv. g <sup>-1</sup> ) | t (μm) | Ionomer        | PPD (W cm <sup>-2</sup> ) | AEMFC durability |                         |                  |                 | Ref.              |
|------------|------------------|--------------|---------------------------------|--------|----------------|---------------------------|------------------|-------------------------|------------------|-----------------|-------------------|
|            |                  |              |                                 |        |                |                           | Temp (°C)        | i (A cm <sup>-2</sup> ) | Time (h)         | Loss (%)        |                   |
| 2012       | DAPP             | BTMA         | 1.7                             | 50     | Phenyl-BTMA    | 0.20                      | 60               | 0.3 V                   | 300              | 67              | <sup>83</sup>     |
| 2018       | Phenyl           | Phenyl-Pip   | 2.7                             | 30     | Phenyl-Pip     | 1.50                      | 80               | 0.2                     | 120              | 10              | <sup>15</sup>     |
| 2018       | Phenyl           | Alkyl-A      | 2.2                             | 30     | FLN            | 1.50                      | 80               | 0.6                     | 550              | 15              | <sup>14</sup>     |
| 2019       | Phenyl           | Phenyl-Pip   | 2.4                             | 25     | Phenyl-Pip     | 1.89                      | 95               | 0.5 <sup>a</sup>        | 300              | 14              | <sup>17</sup>     |
| 2019       | Norbornene       | Alkyl-A      | 3.3                             | 10     | ETFE-BTMA      | 3.5                       | 80               | 0.6                     | 500 <sup>a</sup> | 10              | <sup>88</sup>     |
| 2020       | FLN              | Im           | 2.2                             | 25     | FLN            | 0.62                      | 60               | 0.2                     | 115              | 21              | <sup>89</sup>     |
| 2020       | DAPP             | Alkyl-A      | 2.6                             | 39     | FLN            | 1.22                      | 80               | 0.6                     | 900              | 24              | <sup>90</sup>     |
| 2021       | Phenyl           | Phenyl-Pip   | 2.8                             | 22     | FLN-co-Bipheny | 2.58                      | 80               | 0.4                     | 100              | 27              | <sup>25</sup>     |
| 2021       | HDPE             | BTMA         | 2.4                             | 20     | ETFE-BTMA      | ~2.0                      | 80               | 0.6 <sup>c</sup>        | 150              | 10              | <sup>76</sup>     |
| 2021       | FLN-co-phenyl    | Alkyl-A      | 2.8                             | 15     | FLN            | 2.34                      | 70               | 0.2                     | 200              | 4               | <sup>91</sup>     |
| 2021       | Phenyl           | Phenyl-Pip   | 2.8                             | 20     | Phenyl-Pip     | 2.80                      | 60               | 0.2                     | 500              | 29 <sup>b</sup> | <sup>35</sup>     |
| 2021       | ETFE             | Phenyl-Im    | 1.7                             | 25     | ETFE-BTMA      | 0.71                      | 60               | 0.05                    | 670              | 35              | <sup>92</sup>     |
| 2022       | DAPP             | Alkyl-A      | 2.0                             | 30     | FLN            | 1.50                      | 80               | 1.0                     | 200              | 10              | <sup>93</sup>     |
| 2022       | Carbazole        | Alkyl-A      | 2.3                             | 50     | Carbazole      | 1.05                      | 60               | 0.6                     | 1,000            | 15              | <sup>94</sup>     |
| 2020, 2022 | Norbornene       | Alkyl-A      | 3.3                             | 10     | Norbornene     | 3.2                       | 75               | 0.6                     | 2,000, 3,600     | 4, 19           | <sup>95, 96</sup> |
| 2022       | PE               | Ferrocenium  | 1.7                             | 60     | PE-ferrocenium | 0.74                      | 120              | 0.5                     | 500              | 3.9             | <sup>97</sup>     |
| 2023       | DAPP             | Alkyl-A      | 2.0                             | 25     | Norbornene     | 1.41                      | 80               | 1.0                     | 200              | 15              | <sup>48</sup>     |
| 2023       | Phenyl           | Phenyl-Pip   | 2.4                             | 15     | Phenyl-Pip     | 0.91                      | 80               | 0.25 <sup>c</sup>       | 100              | 25              | <sup>82</sup>     |
| 2023       | Phenyl           | Phenyl-Pip   | 2.5                             | 25     | Phenyl-Pip     | 1.61                      | 60               | OCV                     | 1,000            | 8               | <sup>49</sup>     |
| 2023       | Ethylene-styrene | Phenyl-Pip   | 2.5                             | 40     | Phenyl-Pip     | 0.66                      | 80               | OCV                     | 600              | 9               | <sup>72</sup>     |

<sup>a</sup>H<sub>2</sub>/CO<sub>2</sub>-free air, <sup>b</sup>recoverable loss, <sup>c</sup>PGM-free cathode

**Table S7.** AEMWE performance of MEAs (pure water-fed).

| Year | Backbone          | Cation group | IEC (mequiv. g <sup>-1</sup> ) | t (μm) | Ionomer           | Temp (°C) | Catalyst                         |                    | i at 1.8 V   | Ref.           |
|------|-------------------|--------------|--------------------------------|--------|-------------------|-----------|----------------------------------|--------------------|--------------|----------------|
|      |                   |              |                                |        |                   |           | anode                            | cathode            |              |                |
| 2019 | Polystyrene       | Benzyl-Pip   | 1.2                            | n/a    | SEBS-Pip          | 50        | IrO <sub>2</sub>                 | Pt/C               | 0.08         | <sup>98</sup>  |
| 2020 | FAA-3-PK-1        |              | 1.3                            | 75     | n/a               | 50        | NiFe                             | NiMo               | 0.45         | <sup>99</sup>  |
| 2020 | Phenyl-Pip        |              | 3.3                            | 20     | Phenyl-Pip        | 80        | FeNi                             | Pt/C               | 0.8          | <sup>100</sup> |
| 2020 | Phenyl            | Alkyl-A      | 2.6                            | 26     | BTMA              | 85        | NiFe                             | NiMo               | 0.9          | <sup>101</sup> |
| 2020 | Phenyl            | Alkyl-A      | 2.6                            | 26     | BTMA              | 85        | NiFe                             | PtRu               | 2.75         | <sup>101</sup> |
| 2021 | Phenyl-Pip        |              | 2.2                            | 40     | Phenyl-Pip        | 69        | IrO <sub>2</sub>                 | Pt/C               | 0.75         | <sup>102</sup> |
| 2021 | Phenyl            | Alkyl-A      | 2.0                            | 50     | FLN               | 60        | IrO <sub>2</sub>                 | Pt/C               | 1.0          | <sup>103</sup> |
| 2021 | FLN-co-Phenyl-Pip |              | 2.8                            | 30     | FLN-co-Phenyl-Pip | 80        | IrO <sub>2</sub>                 | Pt/C               | 0.7          | <sup>104</sup> |
| 2021 | SEBS              | Alkyl-A      | 1.7                            | 32     | FLN               | 60        | IrO <sub>2</sub>                 | Pt/C               | 0.82         | <sup>105</sup> |
| 2021 | Phenyl            | Alkyl-A      | 2.0                            | 50     | FLN               | 60        | IrO <sub>2</sub>                 | Pt/C               | 0.75         | <sup>105</sup> |
| 2022 | SEBS              | Alkyl-Pip    | 1.1                            | n/a    | SEBS-Alkyl-Pip    | 60        | IrO <sub>2</sub>                 | Pt/C               | 0.75         | <sup>106</sup> |
| 2022 | Norbior           | Alky-A       |                                | 30     | Norb-Alkyl-A      | 60        | IrOx                             | Pt/C               | 0.4          | <sup>107</sup> |
| 2022 | Phenyl-Pip        |              | 2.7                            | 30     | Phenyl-Pip        | 60        | FeNi                             | Pt/C               | 1.2          | <sup>108</sup> |
| 2022 | Phenyl-Pip        |              | 3.0                            | 50     | Phenyl-Pip        | 80        | NiFe <sub>2</sub> O <sub>4</sub> | NiFeCo             | 2.0 at 1.76V | <sup>109</sup> |
| 2023 | Phenyl-Pip        |              | 1.8                            | 60     | Phenyl-Pip        | 80        | IrO <sub>2</sub>                 | PtRu/C             | 0.6          | <sup>110</sup> |
| 2023 | Biphenyl          | Alkyl-A      | 2.6                            | 50     | Phenyl-alkyl-A    | 60        | IrO <sub>2</sub>                 | Pt/C               | 0.7          | <sup>111</sup> |
| 2023 | Phenyl-Pip        |              | 2.5                            | 25     | Phenyl-Pip        | 90        | FeNi                             | Pt/C               | 1.27         | <sup>49</sup>  |
| 2023 | X37-50            | Im           | 1.1                            | 50     | FAA-3             | 70        | NiFe                             | NiMoO <sub>4</sub> | 0.6          | <sup>112</sup> |

**Table S8.** AEMWE performance of MEAs (KOH-fed).

| Year | Backbone          | Cation group | IEC (meq uiv. g <sup>-1</sup> ) | t (μm) | Ionomer             | KOH (M) / Temp (°C) | Catalyst                         |           | i at 1.8 V     | Ref. |
|------|-------------------|--------------|---------------------------------|--------|---------------------|---------------------|----------------------------------|-----------|----------------|------|
|      |                   |              |                                 |        |                     |                     | anode                            | cathode   |                |      |
| 2018 | Polystyrene       | Im           | 1.1                             | 50     | Benzyl-Im           | 1/60                | NiFe                             | NiFeCo    | 0.5            | 113  |
| 2019 | FAA-3-50          |              | 1.3                             | 50     | FAA-3               | 1/50                | IrO <sub>2</sub>                 | Pt/C      | 0.46           | 113  |
| 2019 | Polystyrene       | Pyrroli      | 2.7                             | 60     | n/a                 | 1/60                | NiFe                             | NiMo      | 0.25           | 114  |
| 2019 | PBI-Im            |              | 2.5                             | 50     | n/a                 | 1/60                | NiAlMo                           | NiAlMo    | 0.85           | 115  |
| 2020 | FAA-3-PK-1        |              | 1.3                             | 75     | n/a                 | 0.1/50              | NiFe                             | NiMo      | 1.0            | 99   |
| 2020 | Carbazole         | Alkyl-A      | 2.3                             | 50     | Carbazole           | 1/70                | IrO <sub>2</sub>                 | Pt/C      | 2.5            | 22   |
| 2020 | BenzIm            |              | 2.3                             | 50     | FAA-3               | 1/60                | Ir black                         | Pt/C      | 1.84           | 116  |
| 2020 | Polystyrene       | Im           | 1.1                             | 50     | Nafion              | 1/80                | Fe-NiMo                          | NiMo      | 0.73 at 1.55 V | 117  |
| 2020 | Polystyrene       | Im           | 1.1                             | 50     | n/a                 | 1/45                | IrO <sub>2</sub>                 | CuCO      | 1.26           | 118  |
| 2020 | Phenyl            | Alkyl-A      | 2.6                             | 26     | BTMA                | 1/85                | NiFe                             | PtRu      | 5.3            | 101  |
| 2021 | Fumapem-3-PE-30   |              | 1.9                             | 30     | FAA-3               | 1/50                | IrO <sub>2</sub>                 | NiCu      | 0.9            | 119  |
| 2021 | Polystyrene       | Pyrroli      | 2.0                             | 80     | PTFE                | 1/80                | NiFe                             | NiMo      | 0.4            | 120  |
| 2021 | X37-50            | Im           | 1.1                             | 50     | n/a                 | 1/50                | NiFeCo                           | NiFeCo    | 0.8            | 121  |
| 2021 | X37-50            | Im           | 1.1                             | 50     | Nafion              | 1/60                | NiCo                             | Pt/C      | 1.0            | 122  |
| 2021 | Phenyl            | Alkyl-A      | 2.0                             | 50     | FLN                 | 0.1/60              | IrO <sub>2</sub>                 | Pt/C      | 2.0            | 103  |
| 2021 | Polysulfone       | BTMA         | 1.0                             | 48     | n/a                 | 1/80                | Ni                               | Pt/C      | 1.0            | 123  |
| 2021 | FLN-co-Phenyl-Pip |              | 2.7                             | 30     | FLN-co-Phenyl-Pip   | 1/80                | IrO <sub>2</sub>                 | Pt/C      | 3.5            | 104  |
| 2022 | Phenyl-Pip        |              | 2.3                             | 30     | Phenyl-Pip          | 1/85                | IrO <sub>2</sub>                 | Pt/C      | 0.7            | 124  |
| 2022 | FLN               | Alkyl-A      | 2.0                             | 43     | FLN                 | 1/70                | IrO <sub>2</sub>                 | Pt/C      | 0.9            | 125  |
| 2022 | FAA-3-50          |              | 1.3                             | 50     | FAA-3               | 1/50                | NiFe                             | Pt/C      | 1.1            | 126  |
| 2022 | FAA-3-50          |              | 1.3                             | 50     | FAA-3               | 1/70                | Ni-IrO <sub>2</sub>              | Pt/C      | 1.2            | 127  |
| 2022 | Polystyrene       | Im           | 1.1                             | 50     | FAA-3               | 1/60                | Perov                            | Pt/C      | 1.16           | 128  |
| 2022 | BenzIm            |              | 2.5                             | 50     | BenzIm              | 1/60                | Ir                               | Pt/C      | 1              | 129  |
| 2022 | SEBS              | Alkyl-Pip    | 1.9                             | n/a    | FAA-3               | 1/70                | IrO <sub>2</sub>                 | Pt/C      | 1.0            | 130  |
| 2022 | Phenyl-Pip        |              | 3.0                             | 50     | Phenyl-Pip          | 1/80                | NiFe <sub>2</sub> O <sub>4</sub> | NiFeCo    | 0.12           | 109  |
| 2022 | FAA-3-50          |              | 1.3                             | 50     | FAA-3               | 1/60                | NiFe-PS                          | NiFe-PS   | 1.5            | 131  |
| 2022 | Norbornene        | Alkyl-A      | n/a                             | 30     | Alkyl-A             | 0.3/50              | PbRuO                            | PtNi      | 1.65           | 132  |
| 2022 | Phenyl            | Alkyl-A      | n/a                             | n/a    | Phenyl-Alkyl-A      | 1/55                | NiFe                             | Pt/C      | 1.0            | 133  |
| 2022 | Carbazole         | Alkyl-A      | 2.3                             | 50     | PTFE                | 1/80                | CuCO                             | Pt/C      | 3.0            | 134  |
| 2023 | Phenyl            | Pip          | 1.8                             | 60     | Phenyl-Pip          | 1/80                | IrO <sub>2</sub>                 | PtRu/C    | 2.0            | 110  |
| 2023 | Phenyl            | Pip          | 2.9                             | 15     | Phenyl-Pip          | 1/80                | IrO <sub>2</sub>                 | Pt/C      | 1.4            | 135  |
| 2023 | Biphenyl          | Alkyl-A      | 2.6                             | 50     | Phenyl-alkyl-A      | 1/60                | IrO <sub>2</sub>                 | Pt/C      | 1.24           | 111  |
| 2023 | Polysulfone       | Alkyl-A      | 1.3                             | 45     | Polysulfone-Alkyl-A | 1/80                | Ni                               | Pt/C      | 0.85           | 136  |
| 2023 | X37-50            | Im           | 1.1                             | 50     | n/a                 | 1/80                | FeNiOOH                          | NC@Ru-CoP | 1.56           | 137  |
| 2023 | Phenyl-Pip        |              | 2.5                             | 25     | Phenyl-Pip          | 1/90                | FeNi                             | Pt/C      | 5.5            | 49   |
| 2023 | Phenyl-Pip        |              | 2.4                             | 80     | Phenyl-Pip          | 1/80                | CO <sub>3</sub> O <sub>4</sub>   | Pt/C      | 1.9            | 138  |
| 2023 | FLN-co-Phenyl-Pip |              | 3.0                             | 50     | Phenyl-Pip          | 1/80                | Fe-Ni-Co                         | PtRu/C    | 7.8            | 139  |



**Table S9.** AEMWE durability of MEAs.

| Year | Backbone            | Cation group | IEC (meq uiv. g <sup>-1</sup> ) | t (μm) | Ionomer           | AEMWE durability                                                            |           |                         |          |                                                            | Ref. |
|------|---------------------|--------------|---------------------------------|--------|-------------------|-----------------------------------------------------------------------------|-----------|-------------------------|----------|------------------------------------------------------------|------|
|      |                     |              |                                 |        |                   | Mode                                                                        | Temp (°C) | Initial V               | Time (h) | Loss (%)                                                   |      |
| 2014 | Phenyl              | BTMA         | 1.7                             | 80     | Phenyl-BTMA       | 0.2 A cm <sup>-2</sup> / water                                              | 50        | 2.2                     | 2,200    | 400 mV                                                     | 140  |
| 2014 | A201                |              | 1.8                             | 28     | PTFE              | 0.5 cm <sup>-2</sup> / 1 wt.% K <sub>2</sub> CO <sub>3</sub>                | 43        | 1.9                     | 1,000    | 150 mV                                                     | 141  |
| 2016 | PolybenzIm          |              | 2.5                             | 34     | FAA-3             | 0.025 A cm <sup>-2</sup> / 1 M KOH                                          | 60        | 2.2                     | 244      | 300 mV                                                     | 11   |
| 2018 | Polystyrene-Im      |              | 1.1                             | 50     | Im                | 1 A cm <sup>-2</sup> / 1 M KOH                                              | 60        | 1.9                     | 2,000    | 5 mV h <sup>-1</sup>                                       | 113  |
| 2019 | PolybenzIm          |              | 2.5                             | 50     | n/a               | 1 A cm <sup>-2</sup> / 1 M KOH                                              | 60        | 2.08                    | 150      | 0.3 mV h <sup>-1</sup>                                     | 142  |
| 2020 | Phenyl              |              | 2.6                             | 26     | Styrene-BTMA      | 0.2 A cm <sup>-2</sup> / water                                              | 60        | 1.8                     | 160      | 1.3 mV h <sup>-1</sup>                                     | 101  |
| 2021 | X37-50              |              | 1.1                             | 50     | Im                | 0.5 A cm <sup>-2</sup> / water                                              | 60        | 1.9                     | 170      | 120 mV                                                     | 143  |
| 2021 | Phenyl-Pip          |              | 2.2                             | 40     | Phenyl-Pip        | 0.5 A cm <sup>-2</sup> / water                                              | 55        | 1.86                    | 180      | 0.67 mV h <sup>-1</sup>                                    | 102  |
| 2021 | Phenyl-Alkyl-A      |              | 2.2                             | 30     | FLN               | 0.75 A cm <sup>-2</sup> / 1wt% K <sub>2</sub> CO <sub>3</sub> / 60-100 psig | 50        | 1.92                    | 400      | 0.3 mV h <sup>-1</sup> (recoverable) ; 0 (non-recoverable) | 105  |
| 2021 | FLN-co-Phenyl-Pip   |              | 2.7                             | 30     | FLN-co-Phenyl-Pip | 0.5 A cm <sup>-2</sup> / 1 M KOH                                            | 60        | 1.6 V                   | 1,000    | 0                                                          | 104  |
| 2021 | Polystyrene         |              | 0.9                             | 50     | Styrene-Im        | 1 A cm <sup>-2</sup> / 1 M KOH                                              | 60        | 1.85                    | 12,000   | 0.02 mV h <sup>-1</sup>                                    | 144  |
| 2022 | Phenyl-Pip          |              | 2.3                             | 30     | Phenyl-Pip        | 0.2 A cm <sup>-2</sup> / 1 M KOH                                            | 60        | 1.75                    | 400      | 0.11 mVh <sup>-1</sup>                                     | 124  |
| 2022 | SEBS                | Alkyl-Pip    | 1.1                             | n/a    | SEBS-Alkyl-Pip    | 2 V/ 0.1 M KOH                                                              | 60        | 0.7 A cm <sup>-2</sup>  | 300      | 1.0 mVh <sup>-1</sup>                                      | 106  |
| 2022 | Norbornene          |              | 3.4                             | 30     | Norbornene        | 1 A cm <sup>-2</sup> /pure water                                            | 60        | 2                       | 500      | 93.5 mV h <sup>-1</sup>                                    | 107  |
| 2022 | Norbornene          |              | 3.4                             | 30     | Norbornene        | 1 A cm <sup>-2</sup> /0.1 M NaOH                                            | 60        | 1.8                     | 600      | stable                                                     | 145  |
| 2022 | Phenyl-Pip          |              | 2.7                             | 30     | Phenyl-Pip        | 0.5 A cm <sup>-2</sup> / pure water                                         | 60        | 1.7                     | 180      | 100 mV                                                     | 108  |
| 2022 | Phenyl-Pip          |              | 3.0                             | 50     | Phenyl-Pip        | 0.2 A cm <sup>-2</sup> / pure water                                         | 80        | 1.6                     | 200      | stable <sup>a</sup>                                        | 109  |
| 2022 | PolybenzIm          |              | 2.1                             | 50     | BenzIm            | 1 A cm <sup>-2</sup> / 1 M KOH                                              | 60        | 1.78                    | 100      | stable                                                     | 129  |
| 2022 | Phenyl-Alkyl-A      |              | n/a                             | n/a    | Phenyl-Alkyl-A    | 1 A cm <sup>-2</sup> / 1 M NaOH                                             | 55        | 1.72                    | 400      | 93 mV h <sup>-1</sup>                                      | 133  |
| 2022 | FAA-3-50            |              | 1.3                             | 50     | FAA-3             | 1 A cm <sup>-2</sup> / 1 M NaOH                                             | 60        | 1.73                    | 300      | 80 mV h <sup>-1</sup>                                      | 131  |
| 2022 | FAA-3-50            |              | 1.3                             | 50     | FAA-3             | 1 A cm <sup>-2</sup> / 1 M KOH                                              | 50        | 2                       | 2,000    | reversible loss                                            | 126  |
| 2022 | Carbazole           | Alkyl-A      | 2.3                             | 50     | PTFE              | 0.5 A cm <sup>-2</sup> / 0.1 M KOH                                          | 45        | 1.73                    | 3,000    | 11.3 mV h <sup>-1</sup>                                    | 134  |
| 2023 | Phenyl-Pip          |              | 1.8                             | 60     | Phenyl-Pip        | 1 A cm <sup>-2</sup> / 0.1 M KOH                                            | 60        | 1.92                    | 300      | 170 mV                                                     | 110  |
| 2023 | X37-50              |              | 1.1                             | 50     | Im                | 0.5 A cm <sup>-2</sup> / 1 M KOH                                            | 80        | 1.65                    | 100      | Stable                                                     | 137  |
| 2023 | Phenyl-Pip          |              | 2.5                             | 25     | Phenyl-Pip        | 0.5 A cm <sup>-2</sup> / 1 M KOH                                            | 60        | 1.62                    | 2,500    | 0.015 mV h <sup>-1</sup>                                   | 49   |
| 2023 | X37-50              | Im           | 1.1                             | 50     | Im                | 1.8 V cm <sup>-2</sup> / pure water                                         | 70        | 0.63 A cm <sup>-2</sup> | 192      | 2.9%                                                       | 112  |
| 2023 | Polysulfone         | BTMA         | 2.2                             | 44     | Polysulfone       | 0.5 A cm <sup>-2</sup> / 2 M NaOH                                           | 30        | 1.75                    | 480      | 3%                                                         | 146  |
| 2023 | Phenyl              | Alkyl-A      | 2.6                             | 50     | Phenyl-Alkyl-A    | 1 A cm <sup>-2</sup> / 1 M KOH                                              | 60        | 1.85                    | 3,500    | 6.5 mV h <sup>-1</sup>                                     | 111  |
| 2023 | Aemion+ (Composite) |              | ~2.5                            | 85     | Nafion            | 1 A cm <sup>-2</sup> / 1 M KOH                                              | 70        | 2.0                     | 5,000    | 0.6 mV h <sup>-1</sup>                                     | 147  |
| 2023 | Phenyl-Pip          |              | 2.4                             | 80     | Phenyl-Pip        | 2 A cm <sup>-2</sup> / 0.1 M KOH                                            | 80        | 2.1                     | 600      | 5 □V h <sup>-1</sup>                                       | 138  |

|      |                   |     |    |            |                                      |    |     |       |                       |     |
|------|-------------------|-----|----|------------|--------------------------------------|----|-----|-------|-----------------------|-----|
| 2023 | FLN-co-Phenyl-Pip | 3.0 | 50 | Phenyl-Pip | 1.5 A cm <sup>-2</sup> /<br>1 M NaOH | 60 | 1.8 | 2,000 | 50 □V h <sup>-1</sup> | 139 |
|------|-------------------|-----|----|------------|--------------------------------------|----|-----|-------|-----------------------|-----|

<sup>a</sup>using phosphate buffer.

**Table S10.** Flow battery performances of membranes. Data was extracted from graphs by Digitizelt Version 2.3.3. IEC values of Nafion are taken from the specification sheets.

| Type           | Year           | Membrane            | CE (%) | VE (%) | EE (%) | IEC (mequiv. g <sup>-1</sup> ) | Ref. |
|----------------|----------------|---------------------|--------|--------|--------|--------------------------------|------|
| AEM            | 2018           | PAEK-API 2.0        | 97.5   | 83.1   | 81.1   | 1.43                           | 148  |
|                | 2018           | QPPP-1              | 100.0  | 70.0   | 70.0   | 1.6                            | 149  |
|                | 2018           | QPPP-2              | 99.0   | 87.0   | 86.1   | 2.0                            | 149  |
|                | 2018           | QPPP-3              | 99.0   | 81.0   | 80.2   | 2.4                            | 149  |
|                | 2018           | IMPPP-1             | 100.0  | 67.0   | 67.0   | 1.2                            | 149  |
|                | 2019           | PE/PP-g-PVBTMA 33%  | 90.1   | 81.1   | 73.0   | 1.48                           | 150  |
|                | 2019           | PE/PP-g-PVBTMA 210% | 91.5   | 82.7   | 75.7   | 3.52                           | 150  |
|                | 2019           | QA-OMPAAEK20        | 97.9   | 83.7   | 81.9   | 2.33                           | 151  |
|                | 2019           | QA-TMPAAEK40        | 95.5   | 84.7   | 81.0   | 2.46                           | 151  |
|                | 2019           | BM-TMIm 4 NN        | 99.7   | 81.8   | 81.5   | 2.75                           | 152  |
|                | 2019           | BM-TMIm 4 NF        | 99.2   | 84.7   | 84.0   | 2.55                           | 152  |
|                | 2019           | BM-TMIm 4 FN        | 99.2   | 86.7   | 86.0   | 2.58                           | 152  |
|                | 2019           | BM-TMIm 4 FF        | 97.6   | 86.8   | 84.7   | 2.37                           | 152  |
|                | 2019           | Im-bPPO             | 96.2   | 78.1   | 75.1   | 0.71                           | 153  |
|                | 2019           | BPN1-100            | 97.9   | 83.7   | 81.9   | 2.6                            | 154  |
|                | 2019           | <i>m</i> -TPN1      | 99.2   | 86.4   | 85.7   | 2.13                           | 154  |
|                | 2019           | <i>p</i> -TPN1      | 99.6   | 86.4   | 86.0   | 2.15                           | 154  |
|                | 2020           | M-PPFSt-MTZ-Me3     | 98.8   | 85.2   | 84.1   | 1.6                            | 155  |
|                | 2020           | M-PPFSt-MTZ-Me4     | 99.9   | 71.7   | 71.6   | 1.15                           | 155  |
|                | 2020           | PBI-GTA-112%        | 98.2   | 92.1   | 90.5   | 2.82                           | 156  |
|                | 2020           | PBI-GTA-93%         | 97.8   | 90.6   | 88.6   | 2.39                           | 156  |
|                | 2020           | PBI-GTA-67%         | 99.2   | 87.6   | 86.9   | 1.9                            | 156  |
|                | 2020           | Py2-ADMPEK-1        | 99.7   | 83.3   | 83.1   | 2.14                           | 157  |
|                | 2020           | Py2-ADMPEK-2        | 97.9   | 88.0   | 86.1   | 2.45                           | 157  |
|                | 2020           | Py2-ADMPEK-3        | 98.6   | 89.5   | 88.2   | 2.59                           | 157  |
|                | 2021           | VIMPPPO 10%         | 94.9   | 73.8   | 70.0   | n/a                            | 158  |
|                | 2021           | VIMPPPO 15%         | 97.5   | 76.5   | 74.6   | n/a                            | 158  |
|                | 2021           | VIMPPPO 20%         | 97.6   | 68.4   | 66.8   | n/a                            | 158  |
|                | 2021           | DQA-TAPFE-20        | 95.1   | 84.4   | 80.3   | 1.55                           | 159  |
|                | 2021           | PTP-CHPTMA          | 98.9   | 89.2   | 88.3   | n/a                            | 160  |
|                | 2021           | PBI-48% BPTMA       | 99.3   | 83.0   | 82.4   | 1.9                            | 161  |
|                | 2021           | PAES-8mPip-0.20     | 96.7   | 84.2   | 81.3   | 1.49                           | 162  |
|                | 2021           | PAES-8mPip-0.25     | 96.2   | 87.2   | 83.9   | 1.64                           | 162  |
|                | 2021           | PAES-8mPip-0.30     | 93.4   | 87.4   | 81.6   | 1.78                           | 162  |
|                | 2021           | QAPPEK-P-50         | 95.6   | 88.6   | 84.6   | 0.98                           | 163  |
|                | 2021           | ImPEEK              | 98.4   | 86.2   | 84.9   | 2.16                           | 164  |
|                | 2021           | ClmPEEK             | 98.5   | 87.2   | 85.9   | 2.04                           | 164  |
|                | 2021           | PTP-QA              | 98.9   | 90.6   | 89.6   | 2.80                           | 165  |
|                | 2021           | CMVI-C10            | 95.3   | 82.5   | 78.6   | 0.98                           | 165  |
|                | 2021           | CMVI-C3             | 97.1   | 83.2   | 78.2   | 1.21                           | 165  |
|                | 2022           | PAPI 2.5            | 96.8   | 85.0   | 82.2   | 1.51                           | 166  |
|                | 2022           | PAPI 2.25           | 97.0   | 83.7   | 81.2   | 1.44                           | 166  |
| 2022           | PTFE/PAPI 2.5  | 97.4                | 85.3   | 83.0   | n/a    | 166                            |      |
| 2022           | PAPI 2.0       | 97.5                | 82.5   | 80.4   | 1.38   | 166                            |      |
| 2022           | PTFE/PAPI 2.25 | 97.6                | 84.1   | 82.2   | n/a    | 166                            |      |
| 2022           | PTFE/PAPI 2.0  | 97.9                | 83.6   | 81.9   | n/a    | 166                            |      |
| Commercial AEM | 2019           | FAP 450             | 98.0   | 79.0   | 77.5   | 2.18                           | 152  |
|                | 2019           | FAP 450             | 98.8   | 83.0   | 82.0   | 0.93                           | 154  |
|                | 2021           | FAP 450             | 98.0   | 74.2   | 72.7   | n/a                            | 158  |
|                | 2022           | FAP 450             | 95.2   | 84.6   | 80.6   | n/a                            | 166  |
| Nafion         | 2018           | Nafion 115          | 97.0   | 86.0   | 83.4   | >0.9                           | 149  |
|                | 2018           | Nafion 117          | 93.6   | 84.0   | 78.6   | >0.9                           | 148  |
|                | 2019           | Nafion 117          | 83.0   | 76.5   | 63.5   | >0.9                           | 150  |
|                | 2019           | Nafion 212          | 87.9   | 92.0   | 80.8   | >0.92                          | 151  |
|                | 2019           | Nafion 212          | 96.0   | 86.9   | 83.4   | >0.92                          | 152  |
|                | 2019           | Nafion 212          | 90.1   | 92.4   | 83.2   | >0.92                          | 153  |
|                | 2019           | Nafion 212          | 91.5   | 86.8   | 79.5   | >0.92                          | 154  |
|                | 2020           | Nafion 212          | 95.6   | 87.0   | 83.1   | >0.92                          | 155  |
|                | 2020           | Nafion 212          | 88.9   | 90.5   | 80.4   | >0.92                          | 156  |
|                | 2020           | Nafion 212          | 85.6   | 90.3   | 77.3   | >0.92                          | 157  |
|                | 2021           | Nafion 115          | 98.1   | 76.2   | 74.8   | >0.9                           | 158  |
| 2021           | Nafion 115     | 97.5                | 83.3   | 81.3   | >0.9   | 160                            |      |

|     |      |                                   |      |      |      |       |     |
|-----|------|-----------------------------------|------|------|------|-------|-----|
|     | 2021 | Nafion 115                        | 97.6 | 79.2 | 77.3 | >0.9  | 161 |
|     | 2021 | Nafion 115                        | 94.4 | 88.1 | 83.1 | >0.9  | 163 |
|     | 2021 | Nafion 115                        | 97.4 | 78.8 | 76.8 | >0.9  | 165 |
|     | 2021 | Nafion 117                        | 94.0 | 81.4 | 79   | >0.9  | 167 |
|     | 2021 | Nafion 212                        | 91.3 | 87.9 | 80.2 | >0.92 | 159 |
|     | 2021 | Nafion 212                        | 95.4 | 85.9 | 82   | >0.92 | 162 |
|     | 2021 | Nafion 212                        | 93.5 | 81.9 | 76.6 | >0.92 | 164 |
|     | 2022 | Nafion 115                        | 90.4 | 86.9 | 78.5 | >0.9  | 166 |
| PBI | 2020 | O-PBI                             | 99.5 | 79.3 | 78.9 | n/a   | 156 |
|     | 2022 | gel-mPBI/py-PBI/gel-mPBI assembly | 98.5 | 91.9 | 90.5 | n/a   | 168 |
|     | 2022 | gel-mPBI/m-PBI/gel-mPBI assembly  | 98.6 | 91.3 | 90.0 | n/a   | 168 |
|     | 2022 | gel-mPBI/PBI-OO/gel-mPBI assembly | 99.9 | 89.3 | 89.3 | n/a   | 168 |
|     | 2023 | p-OPBI/10x-OPBI/p-OPBI assembly   | 99.7 | 91.1 | 90.8 | n/a   | 169 |

**Table S11.** Ion-pair HT-PEMFC durability of MEAs.

| Year | Backbone    | Cation group | IEC (meq uiv. g <sup>-1</sup> ) | t (μm) | Ionomer                        | Ion-pair HT-PEMFC durability                                     |           |                        |          |                                          | Ref. |
|------|-------------|--------------|---------------------------------|--------|--------------------------------|------------------------------------------------------------------|-----------|------------------------|----------|------------------------------------------|------|
|      |             |              |                                 |        |                                | Mode/Reactant gas                                                | Temp (°C) | Initial V              | Time (h) | Loss (%)                                 |      |
| 2016 | DAPP        | BTMA         | 1.7                             | 65     | Styrene-BTMA                   | 0.4 V/P <sub>H<sub>2</sub>O</sub> = 9.7 kPa, H <sub>2</sub> -air | 120       | 0.22 A cm <sup>2</sup> | 500      | 0.33 mA cm <sup>-2</sup> h <sup>-1</sup> | 170  |
| 2020 | PSf         | BTMA         | 1.8                             | 77     | PTFE                           | 0.2 A cm <sup>-2</sup> /H <sub>2</sub> -O <sub>2</sub>           | 160       | 0.54                   | 25       | 16 mV h <sup>-1</sup>                    | 171  |
| 2020 | PolybenzIm  |              | n/a                             | n/a    | n/a                            | 0.2 A cm <sup>-2</sup> /H <sub>2</sub> -O <sub>2</sub>           | 160       | 0.69                   | 390      | 0.1 mV h <sup>-1</sup>                   | 172  |
| 2020 | PSf         | Pyr          | 1.7                             | 39     | PSf-Pyr                        | 0.2 A cm <sup>-2</sup> /H <sub>2</sub> -O <sub>2</sub>           | 180-220   | 0.4                    | 120      | No degradation                           | 173  |
| 2020 | DAPP        | Alkyl-A      | 1.8                             | 40     | Styrene-Phosphonic acid        | 0.6 A cm <sup>-2</sup> /H <sub>2</sub> -air                      | 160       | 0.55                   | 500      | 0.35 mV h <sup>-1</sup>                  | 174  |
| 2021 | PolybenzIm  |              | 3.9                             | 45     | PTFE                           | 0.4 A cm <sup>-2</sup> /H <sub>2</sub> -air                      | 180       | 0.55                   | 48       | 0.5 mV h <sup>-1</sup>                   | 175  |
| 2021 | PolybenzIm  |              | n/a                             | n/a    | n/a                            | 0.3 A cm <sup>-2</sup> /H <sub>2</sub> -air                      | 160       | 0.65                   | 200      | No degradation                           | 176  |
| 2022 | FLN         | Alkyl-A      | 1.84                            | 52     | PTFE                           | 0.15 A cm <sup>-2</sup> /H <sub>2</sub> -O <sub>2</sub>          | 140       | 0.67                   | 60       | 0.2 mV h <sup>-1</sup>                   | 177  |
| 2022 | Polyphe nyl | DABCO        | 2.5                             | 100    | PTFE                           | 0.3 V/8% RH/ H <sub>2</sub> -O <sub>2</sub>                      | 160       | 1.7 A cm <sup>-2</sup> | 60       | 3.3 mA cm <sup>-2</sup> h <sup>-1</sup>  | 178  |
| 2022 | DAPP        | Alkyl-A      | 1.8                             | 35     | Nafion/Styrene-Phosphonic acid | 0.6 A cm <sup>-2</sup> /H <sub>2</sub> -air                      | 160       | 0.52                   | 2,500    | No degradation                           | 179  |
| 2023 | Phenyl-Pip  |              | 1.9                             | 60     | PTFE                           | 0.2 A cm <sup>-2</sup> /H <sub>2</sub> -O <sub>2</sub>           | 120       | 0.7                    | 1,000    | No degradation                           | 180  |

**Table S12.** Performance and durability of CO<sub>2</sub> and CO electrolyzers.

| Year | Membrane             | Electrolyte                                                    | <i>i</i><br>(mA cm <sup>-2</sup> ) | Main product                  | FE (%) | Device durability |         | Ref. |
|------|----------------------|----------------------------------------------------------------|------------------------------------|-------------------------------|--------|-------------------|---------|------|
|      |                      |                                                                |                                    |                               |        | hour              | V       |      |
| 2003 | Selemon              | 0.2 M K <sub>2</sub> SO <sub>4</sub>                           | 100                                | CO                            | > 50   | n/a               | n/a     | 181  |
| 2014 | Fumasep              | 1 M KOH                                                        | 250                                | Propyl alcohol                | 21     | n/a               | n/a     | 182  |
| 2014 | Selemon              | 0.1 M NaHCO <sub>3</sub>                                       | 10                                 | CH <sub>4</sub>               | 85     | 1                 | 1.25    | 183  |
| 2016 | n/a                  | 0.1 M H <sub>2</sub> SO <sub>4</sub>                           | 100                                | CO                            | 92     | 250               | 3       | 184  |
| 2016 | Fumatech             | 1 M KOH & 0.5 M KHCO <sub>3</sub>                              | 200                                | C <sub>2</sub> H <sub>2</sub> | 46     | n/a               | n/a     | 185  |
| 2017 | Sustainion           | Deionized H <sub>2</sub> O                                     | 140                                | Formic acid                   | 94     | 550               | 3.4     | 186  |
| 2017 | n/a                  | 0.5 M KHCO <sub>3</sub>                                        | 200                                | CO                            | 64     | n/a               | n/a     | 187  |
| 2017 | AMI-7001             | 0.01 M KHCO <sub>3</sub>                                       | 200                                | CO                            | 95     | 1,000             | 3.0     | 188  |
| 2017 | AMI-7001             | 0.01 M KHCO <sub>3</sub>                                       | 50                                 | CO                            | 90     | 4,380             | 3.0     | 188  |
| 2018 | Fumatech             | 2.0 M KOH                                                      | 630                                | C <sub>2</sub> H <sub>4</sub> | 42     | 1                 | 3.3     | 189  |
| 2018 | n/a                  | 1 M KHCO <sub>3</sub>                                          | 200                                | CO                            | 90     | n/a               | n/a     | 190  |
| 2018 | Fumatech             | 1 M KHCO <sub>3</sub>                                          | 145                                | HCOO <sup>-</sup>             | 64     | n/a               | n/a     | 191  |
| 2018 | PSMIM                | 0.5 M KHCO <sub>3</sub>                                        | 300                                | CO                            | 90     | 8                 | 2.75    | 192  |
| 2018 | n/a                  | 1.0 M KHCO <sub>3</sub>                                        | 450                                | C <sub>2</sub> H <sub>4</sub> | 50     | n/a               | n/a     | 193  |
| 2018 | n/a                  | 0.1 M KHCO <sub>3</sub>                                        | 450                                | C <sub>2</sub> H <sub>4</sub> | 36     | n/a               | n/a     | 194  |
| 2018 | Fumasep              | 1 M KOH                                                        | 250                                | C <sub>2</sub> H <sub>4</sub> | 18     | n/a               | n/a     | 195  |
| 2018 | Fumasep              | 1 M KHCO <sub>3</sub>                                          | 200                                | C <sub>2</sub> H <sub>4</sub> | 30%    | n/a               | n/a     | 196  |
| 2019 | Fumatech             | 0.1 M CsHCO <sub>3</sub>                                       | 200                                | CO                            | 60     | n/a               | n/a     | 197  |
| 2019 | Sustainion           | 0.1 M KHCO <sub>3</sub>                                        | 100                                | CO                            | 80     | 135               | 3.75    | 198  |
| 2019 | Sustainion           | 0.01 M KHCO <sub>3</sub>                                       | 162                                | CO                            | 97     | 10                | 3.0     | 199  |
| 2019 | n/a                  | 0.1 M KHCO <sub>3</sub>                                        | 150                                | C <sub>2</sub> H <sub>4</sub> | 46     | 100               | 4       | 200  |
| 2019 | Sustainion           | 0.5 M KHCO <sub>3</sub>                                        | 300                                | CO                            | 99     | 9                 | 2.6     | 201  |
| 2019 | Fumasep              | 1 M KHCO <sub>3</sub>                                          | 250                                | EtOH                          | 41     | n/a               | n/a     | 202  |
| 2019 | Fumasep              | 3 M KHCO <sub>3</sub>                                          | 300                                | EtOH                          | 41     | 12                | 3.7     | 203  |
| 2019 | Selemon              | 1 M KHCO <sub>3</sub>                                          | 700                                | CO                            | 85     | 10                | 3.75    | 204  |
| 2019 | Fumatech             | 2.0 M KOH                                                      | 450                                | AcO <sup>-</sup>              | 48     | n/a               | n/a     | 205  |
| 2020 | QAPPT                | 0.1 M KHCO <sub>3</sub> & 0.1 M KOH                            | 350                                | CO                            | 82     | n/a               | n/a     | 206  |
| 2020 | PiperION             | 0.1 M CSOH                                                     | 500                                | CO                            | 80     | 100               | 3.2     | 207  |
| 2020 | Fumasep              | 1 M KHCO <sub>3</sub>                                          | 225                                | CH <sub>4</sub>               | 73     | n/a               | n/a     | 208  |
| 2020 | n/a                  | 3.0 M Cs <sub>2</sub> CO <sub>3</sub>                          | 200                                | CO                            | 90     | n/a               | n/a     | 209  |
| 2020 | Sustainion           | 1.0 M KHCO <sub>3</sub>                                        | 200                                | HCOO <sup>-</sup>             | 92     | 100               | ~2      | 210  |
| 2020 | Sustainion           | 0.1 M KHCO <sub>3</sub>                                        | 220                                | C <sub>2</sub> H <sub>4</sub> | 69     | 100               | 3.8     | 211  |
| 2020 | QAPPT                | pure water                                                     | 200                                | CO                            | 90     | 100               | 2.3     | 212  |
| 2020 | Selemon              | 0.5 M KHCO <sub>3</sub>                                        | 400                                | CO                            | 99     | n/a               | n/a     | 213  |
| 2020 | Sustainion           | 1 M KOH                                                        | 500                                | C <sub>2</sub> H <sub>4</sub> | 33     | n/a               | n/a     | 214  |
| 2020 | Fumasep              | 2 M KOH                                                        | 180                                | AcO <sup>-</sup>              | 42     | n/a               | n/a     | 215  |
| 2020 | Sustainion           | 2 M KHCO <sub>3</sub>                                          | 150                                | CO                            | 55     | n/a               | n/a     | 216  |
| 2020 | Sustainion           | 0.01 M KHCO <sub>3</sub>                                       | 200                                | CO                            | 82     | n/a               | n/a     | 217  |
| 2021 | Aemion               | 1 M KOH                                                        | 50                                 | CO                            | >50    | 100               | 2.3-2.6 | 218  |
| 2021 | Sustainion           | 1 M KOH or 1 M KHCO <sub>3</sub>                               | 150                                | CO                            | 100    | 1.1               | 2.5     | 218  |
| 2021 | Sustainion           | 0.1 M KHCO <sub>3</sub>                                        | 100                                | C <sub>2</sub> H <sub>4</sub> | 40     | 14                | 2.4     | 219  |
| 2021 | Sustainion           | 0.1 M KHCO <sub>3</sub>                                        | 300                                | EtOH                          | 34     | 2                 | 5-6     | 220  |
| 2021 | Fumatech             | 1 M KOH                                                        | 200                                | C <sub>2</sub> H <sub>4</sub> | 40     | n/a               | n/a     | 221  |
| 2021 | Sustainion           | 3 M KOH                                                        | 150                                | C <sub>2</sub> H <sub>4</sub> | 68     | n/a               | n/a     | 222  |
| 2021 | Sustainion           | 1 M KOH                                                        | 500                                | C <sub>2</sub> H <sub>4</sub> | n/a    | 110               | 2.8     | 223  |
| 2021 | Fumasep & Sustainion | 1M KOH                                                         | 200                                | CO                            | 69     | 5                 | 2.6     | 123  |
| 2021 | Fumasep              | 1 M KOH                                                        | 65                                 | HCOO <sup>-</sup>             | 90     | n/a               | n/a     | 224  |
| 2021 | Fumasep, G60         | 0.5 M KHCO <sub>3</sub>                                        | 70                                 | CO                            | 78     | 10                | 2.12    | 225  |
| 2022 | Fumasep, Neosepta    | 0.1 M KOH & 1.0 M KHCO <sub>3</sub>                            | 45                                 | CO                            | n/a    | 16                | 4.1     | 226  |
| 2022 | QAPPT                | KOH, CsOH, KHCO <sub>3</sub>                                   | 500                                | CO                            | 78     | 100               | 3.3     | 227  |
| 2022 | Sustainion           | 3 M KOH                                                        | 100                                | C <sub>2</sub> H <sub>4</sub> | 70     | 83                | 3.0     | 228  |
| 2022 | SC-BPM               | 0.5 M K <sub>2</sub> SO <sub>4</sub> & 0.1 M KHCO <sub>3</sub> | 200                                | C <sub>2</sub> H <sub>4</sub> | 34     | n/a               | n/a     | 229  |
| 2022 | Fumatech             | pure water                                                     | 100                                | CO                            | 30%    | 0.5               | 3.7-3.9 | 230  |
| 2022 | Fumasep              | 1 M KHCO <sub>3</sub>                                          | 347                                | C <sub>2</sub> H <sub>4</sub> | 30%    | n/a               | n/a     | 231  |
| 2022 | Sustainion           | 2 M KOH                                                        | 200                                | AcO <sup>-</sup>              | 36     | n/a               | n/a     | 232  |
| 2022 | Sustainion           | 0.1 M KOH                                                      | 125                                | C <sub>2</sub> H <sub>4</sub> | 68     | 5                 | 3.5     | 233  |
| 2022 | Sustainion           | 0.1 M KOH                                                      | n/a                                | CO                            | 89     | n/a               | n/a     | 234  |

|      |                                            |                           |     |                               |     |     |          |     |
|------|--------------------------------------------|---------------------------|-----|-------------------------------|-----|-----|----------|-----|
| 2022 | Orion AMX                                  | 2 M KOH                   | 200 | acetate                       | 44  | 120 | 2.2      | 235 |
| 2022 | Fumasep                                    | 1 & 3 M KHCO <sub>3</sub> | 125 | n/a                           | n/a | n/a | n/a      | 236 |
| 2023 | Aemion                                     | 0.1 M KHCO <sub>3</sub>   | 200 | CO                            | 96  | 200 | 3.1      | 237 |
| 2023 | PVA/PQ44-OH                                | 0.5 M KHCO <sub>3</sub>   | 250 | n/a                           | 88  | n/a | n/a      | 238 |
| 2023 | Fumasep                                    | 1 M KOH                   | 200 | CO                            | ~95 | 2   | 2.75-3.6 | 239 |
| 2023 | Sustainion                                 | 1 M KOH                   | 100 | HCOO <sup>-</sup>             | 92  | 8   | 2.1      | 240 |
| 2023 | Selecion                                   | 0.1 M KHCO <sub>3</sub>   | 700 | C <sub>2</sub> H <sub>4</sub> | 100 | n/a | n/a      | 241 |
| 2023 | Fumatech                                   | 0.1 M KHCO <sub>3</sub>   | 200 | C <sub>2</sub> H <sub>4</sub> | 78  | 400 | 4.67     | 242 |
| 2023 | Aemion                                     | 0.01 M KHCO <sub>3</sub>  | 100 | CO                            | 90  | 100 | 3.0      | 243 |
| 2023 | Radiation grafted<br>ETFE                  | 0.5 M KHCO <sub>3</sub>   | 300 | CO                            | 90  | n/a | n/a      | 244 |
| 2023 | Radiation grafted<br>ETFE                  | 0.1 M KHCO <sub>3</sub>   | 150 | CO                            | 80  | 200 | 3.1      | 245 |
| 2023 | PVA &<br>poly(diallyldimethyl<br>ammonium) | 0.5 M KHCO <sub>3</sub>   | 18  | HCOO <sup>-</sup>             | 90  | n/a | n/a      | 246 |
| 2023 | Sustainion                                 | 0.1 M KHCO <sub>3</sub>   | 300 | CO                            | 66  | n/a | n/a      | 247 |
| 2023 | PiperION                                   | 0.1 M KHCO <sub>3</sub>   | 300 | CO                            | 40  | 10  | 3.05     | 248 |
| 2023 | Sustainion                                 | 2 M KOH                   | 300 | CO                            | 90  | 1   | 2        | 249 |

## References

1. Y. Wang, G. Wang, G. Li, B. Huang, J. Pan, Q. Liu, J. Han, L. Xiao, J. Lu and L. Zhuang, *Energy & Environmental Science*, 2015, **8**, 177-181.
2. Y. Peng, Y. Wang, X. Wei, J. Zhou, H. Peng, L. Xiao, J. Lu and L. Zhuang, *ACS Applied Materials & Interfaces*, 2018, **10**, 33581-33588.
3. X. Liang, M. A. Shehzad, Y. Zhu, L. Wang, X. Ge, J. Zhang, Z. Yang, L. Wu, J. R. Varcoe and T. Xu, *Chemistry of Materials*, 2019, **31**, 7812-7820.
4. L. Gao, Y. Wang, C. Cui, W. Zheng, X. Yan, P. Zhang, L. Hu, X. Wu, L. Zhuang and G. He, *Journal of Power Sources*, 2019, **438**, 227021.
5. J. Han, B. Lin, H. Peng, Y. Zhu, Z. Ren, L. Xiao and L. Zhuang, *Journal of Power Sources*, 2020, **459**, 227838.
6. L. Li, J.-a. Wang, L. Ma, L. Bai, A. Zhang, N. A. Qaisrani, X. Yan, F. Zhang and G. He, *ACS Sustainable Chemistry & Engineering*, 2021, **9**, 8611-8622.
7. Y. Zhang, W. Chen, T. Li, X. Yan, F. Zhang, X. Wang, X. Wu, B. Pang and G. He, *Journal of Power Sources*, 2021, **490**, 229544.
8. A. C. Yang-Neyerlin, S. Medina, K. M. Meek, D. J. Strasser, C. He, D. M. Knauss, W. E. Mustain, S. Pylypenko and B. S. Pivovar, *Journal of the Electrochemical Society*, 2021, **168**, 044525.
9. L. Zeng, W. Yuan, Q. He, X. Ma, L. Zhang, J. Wang and Z. Wei, *Macromolecules*, 2022, **55**, 4647-4655.
10. J. Han, Y. Zhang, F. Kang, C. Liu, W. Song, X. Zheng, X. Liu, M. Wang, X. Zhou, Z. Ren, M. Hu, L. Xiao and L. Zhuang, *ACS Applied Energy Materials*, 2022, **5**, 11613-11623.
11. A. G. Wright, J. T. Fan, B. Britton, T. Weissbach, H. F. Lee, E. A. Kitching, T. J. Peckham and S. Holdcroft, *Energy & Environmental Science*, 2016, **9**, 2130-2142.
12. H. Ono, T. Kimura, A. Takano, K. Asazawa, J. Miyake, J. Inukai and K. Miyatake, *Journal of Materials Chemistry A*, 2017, **5**, 24804-24812.
13. S. Maurya, C. H. Fujimoto, M. R. Hibbs, C. N. Villarrubia and Y. S. Kim, *Chemistry of Materials*, 2018, **30**, 2188-2192.
14. S. Maurya, S. Noh, I. Matanovic, E. J. Park, C. N. Villarrubia, U. Martinez, J. Han, C. Bae and Y. S. Kim, *Energy & Environmental Science*, 2018, **11**, 3283-3291.
15. H. G. Peng, Q. H. Li, M. X. Hu, L. Xiao, J. T. Lu and L. Zhuang, *Journal of Power Sources*, 2018, **390**, 165-167.
16. Q. H. Li, H. Q. Peng, Y. M. Wang, L. Xiao, J. T. Lu and L. Zhuang, *Angewandte Chemie-International Edition*, 2019, **58**, 1442-1446.
17. J. H. Wang, Y. Zhao, B. P. Setzler, S. Rojas-Carbonell, C. Ben Yehuda, A. Amel, M. Page, L. Wang, K. Hu, L. Shi, S. Gottesfeld, B. J. Xu and Y. S. Yan, *Nature Energy*, 2019, **4**, 392-398.
18. T. Wang, L. Shi, J. H. Wang, Y. Zhao, B. P. Setzler, S. Rojas-Carbonell and Y. S. Yan, *Journal of the Electrochemical Society*, 2019, **166**, F3305-F3310.
19. S. Zhang, X. L. Zhu and C. H. Jin, *Journal of Materials Chemistry A*, 2019, **7**, 6883-6893.
20. E. J. Park, S. Maurya, A. S. Lee, D. P. Leonard, D. G. Li, J. Y. Jeon, C. Bae and Y. S. Kim, *Journal of Materials Chemistry A*, 2019, **7**, 25040-25046.
21. K. Yang, X. F. Li, J. Guo, J. F. Zheng, S. H. Li, S. B. Zhang, X. Z. Cao, T. A. Sherazi and X. Q. Liu, *Journal of Membrane Science*, 2020, **596**, 117720.
22. M. S. Cha, J. E. Park, S. Kim, S. H. Han, S. H. Shin, S. H. Yang, T. H. Kim, D. M. Yu, S. Y. So, Y. T. Hong, S. J. Yoon, S. G. Oh, S. Y. Kang, O. H. Kim, H. S. Park, B. Bae, Y. E. Sung, Y. H. Cho and J. Y. Lee, *Energy & Environmental Science*, 2020, **13**, 3633-3645.
23. J. J. Zhang, K. Y. Zhang, X. Liang, W. S. Yu, X. L. Ge, M. A. Shehzad, Z. J. Ge, Z. J. Yang, L. Wu and T. W. Xu, *Journal of Materials Chemistry A*, 2021, **9**, 327-337.
24. X. Z. Wang, W. T. Chen, T. T. Li, X. M. Yan, Y. Zhang, F. Zhang, X. M. Wu, B. Pang, J.

- N. Li and G. H. He, *Journal of Materials Chemistry A*, 2021, **9**, 7522-7530.
25. N. Chen, C. Hu, H. H. Wang, S. P. Kim, H. M. Kim, W. H. Lee, J. Y. Bae, J. H. Park and Y. M. Lee, *Angewandte Chemie-International Edition*, 2021, **60**, 7710-7718.
26. H. Q. Zhang, Y. Zhang, F. Zhang, X. L. Ge, W. J. Song, C. P. Wei, L. Wu and T. W. Xu, *Journal of Membrane Science Letters*, 2021, **1**, 100007.
27. L. L. Ma, L. Li, M. H. Yuan, L. Bai, A. R. Zhang, X. M. Yan, G. H. He and F. X. Zhang, *ACS Sustainable Chemistry & Engineering*, 2022, **10**, 5748-5757.
28. T. Jiang, C. X. Wang, T. Wang, X. C. Wang, X. J. Wang, X. L. Li, Y. S. Ding and H. B. Wei, *Journal of Membrane Science*, 2022, **660**, 120843.
29. X. F. Li, K. Yang, Z. M. Wang, Y. H. Chen, Y. G. Li, J. Guo, J. F. Zheng, S. H. Li and S. B. Zhang, *Macromolecules*, 2022, **55**, 10607-10617.
30. M. L. Guo, T. Ban, Y. J. Wang, Y. N. Wang, Y. Y. Zhang, J. S. Zhang and X. L. Zhu, *Journal of Membrane Science*, 2022, **647**, 120299.
31. W. T. Gao, X. L. Gao, W. W. Gou, J. J. Wang, Z. H. Cai, Q. G. Zhang, A. M. Zhu and Q. L. Liu, *Journal of Membrane Science*, 2022, **655**, 120578.
32. Q. L. Wei, X. Z. Cao, P. Veh, A. Konovalova, P. Mardle, P. Overton, S. Cassegrain, S. Vierrath, M. Breitwieser and S. Holdcroft, *Sustainable Energy & Fuels*, 2022, **6**, 3551-3564.
33. W. Yuan, L. P. Zeng, S. K. Jiang, C. L. Yuan, Q. He, J. C. Wang, Q. Liao and Z. D. Wei, *Journal of Membrane Science*, 2022, **657**, 120676.
34. J. M. Li, Q. Liu, L. Tian, W. L. Ma, F. H. Wang, Z. Q. Wang and H. Zhu, *International Journal of Hydrogen Energy*, 2022, **47**, 32262-32272.
35. X. Wu, N. Chen, H.-A. Klok, Y. M. Lee and X. Hu, *Angewandte Chemie-International Edition*, 2022, **61**, e202114892.
36. N. Xie, T. Wang, S. H. Du, Q. Weng, K. Zheng, T. Zhang, X. M. Ning, P. Chen, X. B. Chen and Z. W. An, *Journal of Power Sources*, 2023, **574**, 233121.
37. J. J. Wang, W. T. Gao, Y. S. L. Choo, Z. H. Cai, Q. G. Zhang, A. M. Zhu and Q. L. Liu, *Journal of Colloid and Interface Science*, 2023, **629**, 377-387.
38. G. D. Xu, J. Pan, X. Y. Zou, Z. Y. Jin, J. L. Zhang, P. D. Fang, Q. H. Zhang, Z. Sun and F. Yan, *Advanced Functional Materials*, 2023, DOI: 10.1002/adfm.202302364, 2302364.
39. J. Y. Chen, S. C. Xu, X. Su, W. Wei, Y. J. Li, R. L. Du and R. H. He, *ACS Applied Polymer Materials*, 2023, **5**, 6222-6231.
40. X. Li, B. Zhang, J. Guo, Y. Chen, L. Dai, J. Zheng, S. Li and S. Zhang, *Journal of Materials Chemistry A*, 2023, **11**, 10738-10747.
41. X. F. Wan, X. T. Wei, J. M. Ge, L. F. Lu, Z. Q. Liu and Y. Q. Zhu, *Journal of Membrane Science*, 2023, **680**, 121760.
42. Z. Yu, W. T. Gao, Y. J. Liu, Q. G. Zhang, A. M. Zhu and Q. L. Liu, *Journal of Colloid and Interface Science*, 2023, **651**, 404-414.
43. J. J. Chen, C. H. Shen and S. J. Gao, *Desalination*, 2023, **557**, 116600.
44. T. Wang, Y. Zhao, S. Wang, S. Cheng, S. Yang, H. Wei and Y. Ding, *Journal of Power Sources*, 2023, **557**, 232590.
45. S. C. Xu, Y. Gu, T. Y. Ma, X. Su, J. Y. Chen and R. H. He, *ACS Sustainable Chemistry & Engineering*, 2023, **11**, 10402-10412.
46. F. Zhang, Y. Zhang, L. Sun, C. Wei, H. Zhang, L. Wu, X. Ge and T. Xu, *Angewandte Chemie (International ed. in English)*, 2023, **62**, e202215017-e202215017.
47. R. X. Ma, Y. F. Kang, T. Wang, T. Jiang, H. Y. Yin, C. Liu, H. B. Wei and Y. S. Ding, *Journal of Membrane Science*, 2023, **678**, 121667.
48. D. P. Leonard, M. Lehmann, J. M. Klein, I. Matanovic, C. Fujimoto, T. Saito and Y. S. Kim, *Advanced Energy Materials*, 2023, **13**, 2203488.
49. W. J. Song, K. Peng, W. Xu, X. Liu, H. Q. Zhang, X. Liang, B. J. Ye, H. J. Zhang, Z. J. Yang, L. Wu, X. L. Ge and T. W. Xu, *Nature Communications*, 2023, **14**, 2732.



50. X. Y. Wu, N. J. Chen, C. Hu, H. A. Klok, Y. M. Lee and X. L. Hu, *Advanced Materials*, 2023, **35**, 2210432.
51. C. Hu, J. H. Park, N. Y. Kang, X. Zhang, Y. J. Lee, S. W. Jeong and Y. M. Lee, *Journal of Materials Chemistry A*, 2023, **11**, 2031-2041.
52. J. Xue, J. C. Douglin, K. Yassin, T. Huang, H. Jiang, J. Zhang, Y. Yin, D. R. Dekel and M. D. Guiver, *Joule*, 2024, DOI: doi.org/10.1016/j.joule.2024.02.011.
53. R. Espiritu, M. Mamlouk and K. Scott, *International Journal of Hydrogen Energy*, 2016, **41**, 1120-1133.
54. J. Ponce-Gonzalez, D. K. Whelligan, L. Q. Wang, R. Bance-Soualhi, Y. Wang, Y. Q. Peng, H. Q. Peng, D. C. Apperley, H. N. Sarode, T. P. Pandey, A. G. Divekar, S. Seifert, A. M. Herring, L. Zhuang and J. R. Varcoe, *Energy & Environmental Science*, 2016, **9**, 3724-3735.
55. X. Q. Gao, H. M. Yu, J. Jia, J. K. Hao, F. Xie, J. Chi, B. W. Qin, L. Fu, W. Song and Z. G. Shao, *RSC Advances*, 2017, **7**, 19153-19161.
56. L. Q. Wang, E. Magliocca, E. L. Cunningham, W. E. Mustain, S. D. Poynton, R. Escudero-Cid, M. M. Nasef, J. Ponce-Gonzalez, R. Bance-Souahli, R. C. T. Slade, D. K. Whelligan and J. R. Varcoe, *Green Chemistry*, 2017, **19**, 831-843.
57. L. Q. Wang, J. J. Brink, Y. Liu, A. M. Herring, J. Ponce-Gonzalez, D. K. Whelligan and J. R. Varcoe, *Energy & Environmental Science*, 2017, **10**, 2154-2167.
58. Z. Y. Wang, J. Parrondo and V. Ramani, *Journal of the Electrochemical Society*, 2017, **164**, F1216-F1225.
59. L. Q. Wang, M. Bellini, H. A. Miller and J. R. Varcoe, *Journal of Materials Chemistry A*, 2018, **6**, 15404-15412.
60. M. Mandal, G. Huang and P. A. Kohl, *ACS Applied Energy Materials*, 2019, **2**, 2447-2457.
61. J. Y. Jeon, S. Park, J. Han, S. Maurya, A. D. Mohanty, D. Tian, N. Saikia, M. A. Hickner, C. Y. Ryu, M. E. Tuckerman, S. J. Paddison, Y. S. Kim and C. Bae, *Macromolecules*, 2019, **52**, 2139-2147.
62. L. Q. Wang, X. Peng, W. E. Mustain and J. R. Varcoe, *Energy & Environmental Science*, 2019, **12**, 1575-1579.
63. M. Mandal, G. Huang, N. Ul Hassan, X. Peng, T. L. Gu, A. H. Brooks-Starks, B. Bahar, W. E. Mustain and P. A. Kohl, *Journal of the Electrochemical Society*, 2019, **167**, 054501.
64. X. Q. Gao, H. M. Yu, F. Xie, J. K. Hao and Z. G. Shao, *Sustainable Energy & Fuels*, 2020, **4**, 4057-4066.
65. M. Mandal, G. Huang, N. Ul Hassan, W. E. Mustain and P. A. Kohl, *Journal of Materials Chemistry A*, 2020, **8**, 17568-17578.
66. Z. A. Xu, L. Wan, Y. W. Liao, P. C. Wang, K. Liu and B. G. Wang, *Journal of Materials Chemistry A*, 2021, **9**, 23485-23496.
67. L. Zeng, Y. Liao, J. Wang and Z. Wei, *Journal of Power Sources*, 2021, **486**, 229377.
68. W. Yuan, L. P. Zeng, Y. Li, J. C. Wang, X. Wang, Q. Liao, L. Li and Z. D. Wei, *Small*, 2022, **18**, 2105499.
69. Y. H. Chen, P. Li, C. L. Yuan, L. P. Zeng, J. C. Wang, B. S. Li and Z. D. Wei, *ACS Applied Energy Materials*, 2022, **5**, 7748-7757.
70. C. R. Peltier, W. You, D. F. Volcanjk, Q. H. Li, A. J. Macbeth, H. D. Abruna and G. W. Coates, *ACS Energy Letters*, 2023, **8**, 2365-2372.
71. M. Lehmann, D. Leonard, J. C. Zheng, L. L. He, X. M. Tang, X. C. Chen, K. H. Lim, S. Maurya, Y. S. Kim and T. Saito, *ACS Applied Energy Materials*, 2023, **6**, 1822-1833.
72. H. Sun, Z. W. Wang, H. Wang, Z. Zhao and F. Guo, *ACS Applied Energy Materials*, 2023, **6**, 8899-8908.
73. L. Q. Wang, J. J. Brink and J. R. Varcoe, *Chemical Communications*, 2017, **53**, 11771-11773.
74. X. Peng, T. J. Omasta, E. Magliocca, L. Q. Wang, J. R. Varcoe and W. E. Mustain,

- Angewandte Chemie-International Edition*, 2019, **58**, 1046-1051.
75. J. Lilloja, E. Kibena-Poldsepp, A. Sarapuu, J. C. Douglin, M. Kaarik, J. Kozlova, P. Paiste, A. Kikas, J. Aruvali, J. Leis, V. Sammelselg, D. R. Dekel and K. Tammeveski, *ACS Catalysis*, 2021, **11**, 1920-1931.
  76. H. Adabi, A. Shakouri, N. Ul Hassan, J. R. Varcoe, B. Zulevi, A. Serov, J. R. Regalbuto and W. E. Mustain, *Nature Energy*, 2021, **6**, 834-843.
  77. W. Y. Ni, T. Wang, F. Heroguel, A. Krammer, S. Lee, L. Yao, A. Schuler, J. S. Luterbacher, Y. S. Yan and X. L. Hu, *Nature Materials*, 2022, **21**, 804-810.
  78. P. P. Sun, Z. L. Qiao, S. T. Wang, D. Y. Li, X. R. Liu, Q. H. Zhang, L. R. Zheng, Z. B. Zhuang and D. P. Cao, *Angewandte Chemie-International Edition*, 2022, **62**, e202216041.
  79. C. X. Ge, Q. H. Li, M. X. Hu, G. W. Wang, L. Xiao, J. T. Lu and L. Zhuang, *Journal of Power Sources*, 2022, **520**, 230868.
  80. Y. W. Zhou, H. M. Yu, F. Xie, Y. Zhao, X. Y. Sun, D. W. Yao, G. Jiang, J. T. Geng and Z. G. Shao, *International Journal of Hydrogen Energy*, 2023, **48**, 5266-5275.
  81. R. J. Ren, C. X. Ge, Q. H. Li, G. W. Wang, L. Xiao, J. T. Lu and L. Zhuang, *Journal of Power Sources*, 2023, **556**, 232439.
  82. L. Yang, H. B. Liu, Z. L. Qiao, P. P. Sun, D. Y. Li, R. Jiang, S. W. Liu, Z. Q. Niu, Y. G. Zhang, T. Lin, Q. H. Zhang, L. Gu, S. T. Wang, D. P. Cao and Z. W. Chen, *Advanced Energy Materials*, 2023, **13**, 2204390.
  83. C. Fujimoto, D. S. Kim, M. Hibbs, D. Wroblewski and Y. S. Kim, *Journal of Membrane Science*, 2012, **423**, 438-449.
  84. X. J. Zhang, Y. J. Cao, M. Zhang, Y. G. Wang, H. Y. Tang and N. W. Li, *Journal of Membrane Science*, 2020, **598**, 117793.
  85. X. Liang, X. L. Ge, Y. B. He, M. Xu, M. A. Shehzad, F. M. Sheng, R. Bance-Soualhi, J. J. Zhang, W. S. Yu, Z. J. Ge, C. P. Wei, W. J. Song, J. L. Peng, J. R. Varcoe, L. Wu and T. W. Xu, *Advanced Science*, 2021, **8**, 2102637.
  86. H. Yang, Y. Jiang, K. Wu, S. Cai, W. Ma, Z. Cao, F. Gong, C. Liu, G. Tao and J. Pan, *Journal of Materials Chemistry A*, 2022, **10**, 22617-22628.
  87. S. Ayaz, Z.-Y. Yao, Y. Yang and H. Y. Yu, *Journal of Membrane Science*, 2023, **680**, 121736.
  88. G. Huang, M. Mandal, X. Peng, A. C. Yang-Neyerlin, B. S. Pivovar, W. E. Mustain and P. A. Kohl, *Journal of the Electrochemical Society*, 2019, **166**, F637-F644.
  89. K. Yang, X. M. Chu, X. J. Zhang, X. F. Li, J. F. Zheng, S. H. Li, N. W. Li, T. A. Sherazi and S. B. Zhang, *Journal of Membrane Science*, 2020, **603**, 118025.
  90. D. P. Leonard, S. Maurya, E. J. Park, L. D. Manriquez, S. Noh, X. F. Wang, C. Bae, E. D. Baca, C. Fujimoto and Y. S. Kim, *Journal of Materials Chemistry A*, 2020, **8**, 14135-14144.
  91. N. J. Chen, H. H. Wang, S. P. Kim, H. M. Kim, W. H. Lee, C. Hu, J. Y. Bae, E. S. Sim, Y. C. Chung, J. H. Jang, S. J. Yoo, Y. B. Zhuang and Y. M. Lee, *Nature Communications*, 2021, **12**, 2367.
  92. A. M. A. Mahmoud, K. Yoshimura and Y. Maekawa, *Journal of Membrane Science*, 2021, **620**, 118844.
  93. S. Adhikari, D. P. Leonard, K. H. Lim, E. J. Park, C. Fujimoto, O. Morales-Collazo, J. F. Brennecke, Z. D. Hu, H. F. Jia and Y. S. Kim, *ACS Applied Energy Materials*, 2022, **5**, 2663-2668.
  94. J. Hyun, W. Jo, S. H. Yang, S. H. Shin, G. Doo, S. Choi, D. H. Lee, D. W. Lee, E. Oh, J. Y. Lee and H. T. Kim, *Journal of Power Sources*, 2022, **543**, 231835.
  95. N. Ul Hassan, M. Mandal, G. R. Huang, H. A. Firouzjaie, P. A. Kohl and W. E. Mustain, *Advanced Energy Materials*, 2020, **10**, 2001986.
  96. N. Ul Hassan, M. J. Zachman, M. Mandal, H. A. Firouzjaie, P. A. Kohl, D. A. Cullen and W. E. Mustain, *ACS Catalysis*, 2022, **12**, 8116-8126.
  97. X. Liu, N. Xie, J. Xue, M. Li, C. Zheng, J. Zhang, Y. Qin, Y. Yin, D. R. Dekel and M. D.

- Guiver, *Nature Energy*, 2022, **7**, 329-339.
98. A. Abbasi, M. M. Nasef, S. Kheawhom, R. Faridi-Majidi, M. Takeshi, E. Abouzari-Lotf and T. Choong, *Radiation Physics and Chemistry*, 2019, **156**, 58-66.
  99. P. Thangavel, M. R. Ha, S. Kumaraguru, A. Meena, A. N. Singh, A. M. Harzandi and K. S. Kim, *Energy & Environmental Science*, 2020, **13**, 3447-3458.
  100. J. W. Xiao, A. M. Oliveira, L. Wang, Y. Zhao, T. Wang, J. H. Wang, B. P. Setzler and Y. S. Yan, *ACS Catalysis*, 2021, **11**, 264-270.
  101. D. G. Li, E. J. Park, W. L. Zhu, Q. R. Shi, Y. Zhou, H. Y. Tian, Y. H. Lin, A. Serov, B. Zulevi, E. D. Baca, C. Fujimoto, H. T. Chung and Y. S. Kim, *Nature Energy*, 2020, **5**, 378-385.
  102. G. A. Lindquist, S. Z. Oener, R. Krivina, A. R. Motz, A. Keane, C. Capuano, K. E. Ayers and S. W. Boettcher, *ACS Applied Materials & Interfaces*, 2021, **13**, 51917-51924.
  103. K. Li, S. L. Yu, D. G. Li, L. Ding, W. T. Wang, Z. Q. Xie, E. J. Park, C. Fujimoto, D. A. Cullen, Y. S. Kim and F. Y. Zhang, *ACS Applied Materials & Interfaces*, 2021, **13**, 50957-50964.
  104. N. Chen, S. Y. Paek, J. Y. Lee, J. H. Park, S. Y. Lee and Y. M. Lee, *Energy & Environmental Science*, 2021, **14**, 6338-6348.
  105. A. R. Motz, D. G. Li, A. Keane, L. D. Manriquez, E. J. Park, S. Maurya, H. Chung, C. Fujimoto, J. Jeon, M. K. Pagels, C. Bae, K. E. Ayers and Y. S. Kim, *Journal of Materials Chemistry A*, 2021, **9**, 22670-22683.
  106. Z. Q. Xu, V. Wilke, J. J. Chmielarz, M. Tobias, V. Atanasov, A. S. Gago and K. A. Friedrich, *Journal of Membrane Science*, 2023, **670**, 121302.
  107. N. Ul Hassan, Y. W. Zheng, P. A. Kohl and W. E. Mustain, *Journal of the Electrochemical Society*, 2022, **169**, 044526.
  108. L. Wan, J. Liu, Z. Xu, Q. Xu, M. B. Pang, P. C. Wang and B. G. Wang, *Small*, 2022, **18**, 2200380.
  109. C. Lei, K. C. Yang, G. Z. Wang, G. W. Wang, J. T. Lu, L. Xiao and L. Zhuang, *ACS Sustainable Chemistry & Engineering*, 2022, **10**, 16725-16733.
  110. L. Liu, L. Bai, Z. R. Liu, S. S. Miao, J. Pan, L. S. Shen, Y. Shi and N. W. Li, *Journal of Membrane Science*, 2023, **665**, 121135.
  111. Z. T. Jiang, G. Q. Yi, X. Yao, Y. C. Ma, X. Y. Su, Q. L. Liu and Q. G. Zhang, *Chemical Engineering Journal*, 2023, **467**, 143442.
  112. P. Thangavel, H. Lee, T.-H. Kong, S. Kwon, A. Tayyebi, J.-h. Lee, S. M. Choi and Y. Kwon, *Advanced Energy Materials*, 2023, **13**, 2203401.
  113. J. J. Kaczur, H. Yang, Z. Liu, S. A. Sajjad and R. I. Masel, *Frontiers in Chemistry*, 2018, **6**, 263.
  114. J. E. Park, S. Y. Kang, S.-H. Oh, J. K. Kim, M. S. Lim, C.-Y. Ahn, Y.-H. Cho and Y.-E. Sung, *Electrochimica Acta*, 2019, **295**, 99-106.
  115. H. Li, M. R. Kraglund, A. K. Reumert, X. Ren, D. Aili and J. Yang, *Journal of Materials Chemistry A*, 2019, **7**, 17914-17922.
  116. P. Fortin, T. Khoza, X. Z. Cao, S. Y. Martinsen, A. O. Barnett and S. Holdcroft, *Journal of Power Sources*, 2020, **451**, 227814.
  117. P. Z. Chen and X. L. Hu, *Advanced Energy Materials*, 2020, **10**, 2002285.
  118. Y. S. Park, J. Yang, J. Lee, M. J. Jang, J. Jeong, W. S. Choi, Y. Kim, Y. D. Yin, M. H. Seo, Z. W. Chen and S. M. Choi, *Applied Catalysis B-Environmental*, 2020, **278**, 119276.
  119. A. Y. Faid, A. O. Barnett, F. Seland and S. Sunde, *Electrochimica Acta*, 2021, **371**, 137837.
  120. H. Li, N. Yu, F. Gellrich, A. K. Reumert, M. R. Kraglund, J. Dong, D. Aili and J. Yang, *Journal of Membrane Science*, 2021, **633**, 119418.
  121. J. Lee, H. Jung, Y. S. Park, N. Kwon, S. Woo, N. C. S. Selvam, G. S. Han, H. S. Jung, P. J. Yoo, S. M. Choi, J. W. Han and B. Lim, *Applied Catalysis B-Environmental*, 2021, **294**, 120246.

122. Y. S. Park, J. Jeong, Y. Noh, M. J. Jang, J. Lee, K. H. Lee, D. C. Lim, M. H. Seo, W. B. Kim, J. C. Yang and S. M. Choi, *Applied Catalysis B-Environmental*, 2021, **292**, 120170.
123. J. Abed, S. Ahmadi, L. Laverdure, A. Abdellah, C. P. O'Brien, K. Cole, P. Sobrinho, D. Sinton, D. Higgins, N. J. Mosey, S. J. Thorpe and E. H. Sargent, *Advanced Materials*, 2021, **33**, 2103812.
124. M. Liu, X. Hu, B. Hu, L. Liu and N. W. Li, *Journal of Membrane Science*, 2022, **642**, 119966.
125. H. Lim, I. Jeong, J. Choi, G. Shin, J. Kim, T.-H. Kim and T. Park, *Applied Surface Science*, 2023, **610**, 155601.
126. S. C. Zignani, M. Lo Faro, A. Carbone, C. Italiano, S. Trocino, G. Monforte and A. S. Arico, *Electrochimica Acta*, 2022, **413**, 140078.
127. D.-H. Park, M.-H. Kim, H.-J. Lee, W.-J. Lee, J.-H. Byeon, J.-H. Kim, J.-S. Jang and K.-W. Park, *Advanced Materials Interfaces*, 2022, **9**, 2102063.
128. D. Chen, Y. S. Park, F. Liu, L. Fang and C. Duan, *Chemical Engineering Journal*, 2023, **452**, 139105.
129. B. Chen, P. Mardle and S. Holdcroft, *Journal of Power Sources*, 2022, **550**, 232134.
130. X. Wang and R. G. H. Lammertink, *Journal of Materials Chemistry A*, 2022, **10**, 8401-8412.
131. L. Wan, Z. Xu, P. Wang, P.-F. Liu, Q. Xu and B. Wang, *Chemical Engineering Journal*, 2022, **431**, 133942.
132. M. Mandal, B. Zulevi, P. A. Kohl, W. E. Mustain and N. Ul Hassan, *Electrochimica Acta*, 2022, **409**, 140001.
133. W. Y. Jiang, A. Y. Faid, B. F. Gomes, I. Galkina, L. Xia, C. M. S. Lobo, M. Desmau, P. Borowski, H. Hartmann, A. Maljusch, A. Besmehn, C. Roth, S. Sunde, W. Lehnert and M. Shviro, *Advanced Functional Materials*, 2022, **32**, 2203520.
134. M. J. Jang, S. H. Yang, M. G. Park, J. Jeong, M. S. Cha, S. H. Shin, K. H. Lee, Z. Y. Bai, Z. W. Chen, J. Y. Lee and S. M. Choi, *ACS Energy Letters*, 2022, **7**, 2576-2583.
135. W. T. Gao, X. L. Gao, Y. S. L. Choo, J. J. Wang, Z. H. Cai, Q. G. Zhang, A. M. Zhu and Q. L. Liu, *Chemical Engineering Journal*, 2023, **466**, 143107.
136. C. Simari, A. Capri, M. H. U. Rehman, A. Enotiadis, I. Gatto, V. Baglio and I. Nicotera, *Electrochimica Acta*, 2023, **462**, 142788.
137. Z. P. Wang, K. Chi, S. X. Yang, J. W. Xiao, F. Xiao, X. X. Zhao and S. Wang, *Small*, 2023, **19**, 2301403.
138. A. W. Tricker, T. Y. Ertugrul, J. K. Lee, J. R. Shin, W. Choi, D. I. Kushner, G. Wang, J. Lang, I. V. Zenyuk, A. Z. Weber and X. Peng, *Advanced Energy Materials*, 2303629.
139. C. Hu, N. Y. Kang, H. W. Kang, J. Y. Lee, X. Zhang, Y. J. Lee, S. W. Jung, J. H. Park, M.-G. Kim, S. J. Yoo, S. Y. Lee, C. H. Park and Y. M. Lee, *Angewandte Chemie International Edition*, 2024, **63**, e202316697.
140. Y. K. Choe, C. Fujimoto, K. S. Lee, L. T. Dalton, K. Ayers, N. J. Henson and Y. S. Kim, *Chemistry of Materials*, 2014, **26**, 5675-5682.
141. C. C. Pavel, F. Cecconi, C. Emiliani, S. Santiccioli, A. Scaffidi, S. Catanorchi and M. Comotti, *Angewandte Chemie-International Edition*, 2014, **53**, 1378-1381.
142. L. Wang, T. Weissbach, R. Reissner, A. Ansar, A. S. Gago, S. Holdcroft and K. A. Friedrich, *ACS Applied Energy Materials*, 2019, **2**, 7903-7912.
143. F. Razmjooei, T. Morawietz, E. Taghizadeh, E. Hadjixenophontos, L. Mues, M. Gerle, B. D. Wood, C. Harms, A. S. Gago, S. A. Ansar and K. A. Friedrich, *Joule*, 2021, **5**, 1776-1799.
144. B. Motealleh, Z. Liu, R. I. Masel, J. P. Sculley, Z. R. Ni and L. Meroueh, *International Journal of Hydrogen Energy*, 2021, **46**, 3379-3386.
145. M. Chen, M. Mandal, K. Groenhout, G. McCool, H. M. Tee, B. Zulevi and P. A. Kohl, *Journal of Power Sources*, 2022, **536**, 231495.

146. J. Qian, C. Wang, X. Zhang, J. Hu, X. Zhao, J. Li and Q. Ren, *Journal of Power Sources*, 2023, **564**, 232877.
147. M. Moreno-Gonzalez, P. Mardle, S. Zhu, B. Gholamkhash, S. Jones, N. Chen, B. Britton and S. Holdcroft, *Journal of Power Sources Advances*, 2023, **19**, 100109.
148. Y. Ahn and D. Kim, *Journal of Industrial and Engineering Chemistry*, 2019, **71**, 361-368.
149. M. S. Cha, S. W. Jo, S. H. Han, S. H. Hong, S. So, T. H. Kim, S. G. Oh, Y. T. Hong and J. Y. Lee, *Journal of Power Sources*, 2019, **413**, 158-166.
150. M. Abdiani, E. Abouzari-Lotf, T. M. Ting, P. M. Nia, S. S. Sha'rani, A. Shockravi and A. Ahmad, *Journal of Power Sources*, 2019, **424**, 245-253.
151. Y. Chen, Z. C. Liu, M. J. Lin, Q. L. Lin, B. H. Tong and D. Y. Chen, *Science China-Chemistry*, 2019, **62**, 479-490.
152. H. Cho, H. M. Krieg and J. A. Kerres, *Membranes*, 2019, **9**, 31.
153. S. H. Roh, M. H. Lim, T. Sadhasivam and H. Y. Jung, *Electrochimica Acta*, 2019, **325**, 134944.
154. T. S. Wang, J. Y. Jeon, J. Han, J. H. Kim, C. Bae and S. Kim, *Journal of Membrane Science*, 2020, **598**, 117665.
155. H. Cho, V. Atanasov, H. M. Krieg and J. A. Kerres, *Polymers*, 2020, **12**, 915.
156. Y. Du, L. Gao, L. Hu, M. T. Di, X. M. Yan, B. G. An and G. H. He, *Journal of Membrane Science*, 2020, **603**, 118011.
157. B. G. Zhang, F. F. Wang, S. S. Guan, M. H. Zhao, E. L. Zhang, G. S. Wang, Z. G. Zhang, X. Q. Liu and S. H. Zhang, *Journal of Power Sources*, 2020, **477**, 229011.
158. M. Charyton, C. Iojoiu, P. Fischer, G. Henrion, M. Etienne and M. L. Donten, *Membranes*, 2021, **11**, 436.
159. Y. Chen, Y. Y. Li, J. Q. Xu, S. Y. Chen and D. Y. Chen, *ACS Applied Materials & Interfaces*, 2021, **13**, 18923-18933.
160. W. Q. Tang, T. Mu, X. F. Che, J. H. Dong and J. S. Yang, *ACS Sustainable Chemistry & Engineering*, 2021, **9**, 14297-14306.
161. W. Q. Tang, Y. F. Yang, X. L. Liu, J. H. Dong, H. H. Li and J. S. Yang, *Electrochimica Acta*, 2021, **391**, 138919.
162. Z. W. Tao, C. Y. Wang, S. J. Cai, J. F. Qian and J. Li, *ACS Applied Energy Materials*, 2021, **4**, 14488-14496.
163. Z. Q. Wang, S. H. Zhang, Q. Liu, Y. I. Chen, Z. H. Weng and X. G. Jian, *Journal of Membrane Science*, 2021, **633**, 119416.
164. S. Yang, X. F. Chu, B. Xue, T. Lv, B. C. Lin and Z. H. Zhang, *ACS Applied Energy Materials*, 2021, **4**, 6787-6796.
165. X. F. Che, W. Q. Tang, J. H. Dong, D. Aili and J. S. Yang, *Science China-Materials*, 2022, **65**, 683-694.
166. Y. Ahn and D. Kim, *Journal of Industrial and Engineering Chemistry*, 2022, **110**, 395-404.
167. A. K. Singh, P. Sharma, K. Singh and V. K. Shahi, *Journal of Power Sources*, 2022, **520**, 230856.
168. X. H. Do, S. Abbas, M. M. Ikhsan, S. Y. Choi, H. Y. Ha, K. Azizi, H. A. Hjuler and D. Henkensmeier, *Small*, 2022, **18**, e2206284.
169. T. T. Bui, M. Shin, M. Rahimi, A. Bentien, Y. Kwon and D. Henkensmeier, *Carbon Energy*, 2023, DOI: 10.1002/cey2.473, Preprints.
170. K. S. Lee, J. S. Spendelow, Y. K. Choe, C. Fujimoto and Y. S. Kim, *Nature Energy*, 2016, **1**, 16120.
171. H. Tang, K. Geng, J. Hao, X. Zhang, Z. Shao and N. Li, *Journal of Power Sources*, 2020, **475**, 228521.
172. C. Gao, M. Hu, L. Wang and L. Wang, *Polymers*, 2020, **12**, 515.
173. G. Venugopalan, K. Chang, J. Nijoka, S. Livingston, G. M. Geise and C. G. Arges, *ACS Applied Energy Materials*, 2020, **3**, 573-585.

174. V. Atanasov, A. S. Lee, E. J. Park, S. Maurya, E. D. Baca, C. Fujimoto, M. Hibbs, I. Matanovic, J. Kerres and Y. S. Kim, *Nature Materials*, 2021, **20**, 370-377.
175. F. Arslan, K. Chuluunbandi, A. T. S. Freiberg, A. Kormanyos, F. Sit, S. Cherevko, J. Kerres, S. Thiele and T. Boehm, *ACS Applied Materials & Interfaces*, 2021, **13**, 56594-56606.
176. F. Liu, S. Wang, D. Wang, G. Liu, Y. Cui, D. Liang, X. Wang, Z. Yong and Z. Wang, *Journal of Power Sources*, 2021, **494**, 229732.
177. J. Jiang, Z. Li, M. Xiao, S. Wang, K. Miyatake and Y. Meng, *Journal of Membrane Science*, 2022, **660**, 120878.
178. Q. Ju, H. Tang, G. Chao, T. Guo, K. Geng and N. Li, *Journal of Materials Chemistry A*, 2022, **10**, 25295-25306.
179. K. H. Lim, A. S. Lee, V. Atanasov, J. Kerres, E. J. Park, S. Adhikari, S. Maurya, L. D. Manriquez, J. Jung, C. Fujimoto, I. Matanovic, J. Jankovic, Z. D. Hu, H. F. Jia and Y. S. Kim, *Nature Energy*, 2022, **7**, 248-259.
180. J. Li, C. Yang, X. Zhang, Z. Xia, S. Wang, S. Yu and G. Sun, *Journal of Materials Chemistry A*, 2023, **11**, 18409-18418.
181. Y. Hori, H. Ito, K. Okano, K. Nagasu and S. Sato, *Electrochimica Acta*, 2003, **48**, 2651-2657.
182. C. W. Li, J. Ciston and M. W. Kanan, *Nature*, 2014, **508**, 504-507.
183. K. Manthiram, B. J. Beberwyck and A. P. Alivisatos, *Journal of the American Chemical Society*, 2014, **136**, 13319-13325.
184. Z. Liu, R. I. Masel, Q. Chen, R. Kutz, H. Yang, K. Lewinski, M. Kaplun, S. Luopa and D. R. Lutz, *Journal of CO2 Utilization*, 2016, **15**, 50-56.
185. S. Ma, M. Sadakiyo, R. Luo, M. Heima, M. Yamauchi and P. J. A. Kenis, *Journal of Power Sources*, 2016, **301**, 219-228.
186. H. Yang, J. J. Kaczur, S. D. Sajjad and R. I. Masel, *Journal of CO2 Utilization*, 2017, **20**, 208-217.
187. S. Ma, J. Liu, K. Sasaki, S. M. Lyth and P. J. A. Kenis, *Energy Technology*, 2017, **5**, 861-863.
188. R. B. Kutz, Q. Chen, H. Yang, S. D. Sajjad, Z. Liu and I. R. Masel, *Energy Technology*, 2017, **5**, 929-936.
189. M. Jouny, W. Luc and F. Jiao, *Nature Catalysis*, 2018, **1**, 748-755.
190. C.-T. Dinh, F. P. García de Arquer, D. Sinton and E. H. Sargent, *ACS Energy Letters*, 2018, **3**, 2835-2840.
191. C. Liang, B. Kim, S. Yang, L. Yang, C. Francisco Woellner, Z. Li, R. Vajtai, W. Yang, J. Wu, P. J. A. Kenis and Pulickel M. Ajayan, *Journal of Materials Chemistry A*, 2018, **6**, 10313-10319.
192. K. Jiang, S. Siahrostami, T. Zheng, Y. Hu, S. Hwang, E. Stavitski, Y. Peng, J. Dynes, M. Gangisetty, D. Su, K. Attenkofer and H. Wang, *Energy & Environmental Science*, 2018, **11**, 893-903.
193. M. G. Kibria, C.-T. Dinh, A. Seifitokaldani, P. De Luna, T. Burdyny, R. Quintero-Bermudez, M. B. Ross, O. S. Bushuyev, F. P. García de Arquer, P. Yang, D. Sinton and E. H. Sargent, *Advanced Materials*, 2018, **30**, 1804867.
194. P. De Luna, R. Quintero-Bermudez, C.-T. Dinh, M. B. Ross, O. S. Bushuyev, P. Todorović, T. Regier, S. O. Kelley, P. Yang and E. H. Sargent, *Nature Catalysis*, 2018, **1**, 103-110.
195. L. Han, W. Zhou and C. Xiang, *ACS Energy Letters*, 2018, **3**, 855-860.
196. J.-J. Lv, M. Jouny, W. Luc, W. Zhu, J.-J. Zhu and F. Jiao, *Advanced Materials*, 2018, **30**, 1803111.
197. A. Pătru, T. Binninger, B. Pribyl and T. J. Schmidt, *Journal of the Electrochemical Society*, 2019, **166**, F34.
198. W. Ju, F. Jiang, H. Ma, Z. Pan, Y.-B. Zhao, F. Pagani, D. Rentsch, J. Wang and C.

- Battaglia, *Advanced Energy Materials*, 2019, **9**, 1901514.
199. J. Lee, J. Lim, C.-W. Roh, H. S. Whang and H. Lee, *Journal of CO2 Utilization*, 2019, **31**, 244-250.
200. C. M. Gabardo, C. P. O'Brien, J. P. Edwards, C. McCallum, Y. Xu, C.-T. Dinh, J. Li, E. H. Sargent and D. Sinton, *Joule*, 2019, **3**, 2777-2791.
201. H.-Y. Jeong, M. Balamurugan, V. S. K. Choutipalli, E.-s. Jeong, V. Subramanian, U. Sim and K. T. Nam, *Journal of Materials Chemistry A*, 2019, **7**, 10651-10661.
202. Y. C. Li, Z. Wang, T. Yuan, D.-H. Nam, M. Luo, J. Wicks, B. Chen, J. Li, F. Li, F. P. G. de Arquer, Y. Wang, C.-T. Dinh, O. Voznyy, D. Sinton and E. H. Sargent, *Journal of the American Chemical Society*, 2019, **141**, 8584-8591.
203. P. G. Santori, F. D. Speck, S. Cherevko, H. A. Firouzjaie, X. Peng, W. E. Mustain and F. Jaouen, *Journal of The Electrochemical Society*, 2020, **167**, 134505.
204. T. Möller, W. Ju, A. Bagger, X. Wang, F. Luo, T. Ngo Thanh, A. S. Varela, J. Rossmeisl and P. Strasser, *Energy & Environmental Science*, 2019, **12**, 640-647.
205. W. Luc, X. Fu, J. Shi, J.-J. Lv, M. Jouny, B. H. Ko, Y. Xu, Q. Tu, X. Hu, J. Wu, Q. Yue, Y. Liu, F. Jiao and Y. Kang, *Nature Catalysis*, 2019, **2**, 423-430.
206. P. Wei, H. Li, L. Lin, D. Gao, X. Zhang, H. Gong, G. Qing, R. Cai, G. Wang and X. Bao, *Science China Chemistry*, 2020, **63**, 1711-1715.
207. B. Endrődi, E. Kecszenovity, A. Samu, T. Halmágyi, S. Rojas-Carbonell, L. Wang, Y. Yan and C. Janáky, *Energy & Environmental Science*, 2020, **13**, 4098-4105.
208. X. Wang, A. Xu, F. Li, S.-F. Hung, D.-H. Nam, C. M. Gabardo, Z. Wang, Y. Xu, A. Ozden, A. S. Rasouli, A. H. Ip, D. Sinton and E. H. Sargent, *Journal of the American Chemical Society*, 2020, **142**, 3525-3531.
209. S. S. Bhargava, F. Proietto, D. Azmoodeh, E. R. Cofell, D. A. Henckel, S. Verma, C. J. Brooks, A. A. Gewirth and P. J. A. Kenis, *ChemElectroChem*, 2020, **7**, 2001-2011.
210. L. Fan, C. Xia, P. Zhu, Y. Lu and H. Wang, *Nature Communications*, 2020, **11**, 3633.
211. A. Ozden, F. Li, F. P. García de Arquer, A. Rosas-Hernández, A. Thevenon, Y. Wang, S.-F. Hung, X. Wang, B. Chen, J. Li, J. Wicks, M. Luo, Z. Wang, T. Agapie, J. C. Peters, E. H. Sargent and D. Sinton, *ACS Energy Letters*, 2020, **5**, 2811-2818.
212. Z. Yin, H. Peng, X. Wei, H. Zhou, J. Gong, M. Huai, L. Xiao, G. Wang, J. Lu and L. Zhuang, *Energy & Environmental Science*, 2019, **12**, 2455-2462.
213. T. Zhang, L. Lin, Z. Li, X. He, S. Xiao, V. N. Shanov and J. Wu, *ACS Applied Energy Materials*, 2020, **3**, 1617-1626.
214. C. Zhao, G. Luo, X. Liu, W. Zhang, Z. Li, Q. Xu, Q. Zhang, H. Wang, D. Li, F. Zhou, Y. Qu, X. Han, Z. Zhu, G. Wu, J. Wang, J. Zhu, T. Yao, Y. Li, H. J. M. Bouwmeester and Y. Wu, *Advanced Materials*, 2020, **32**, 2002382.
215. F. Ni, H. Yang, Y. Wen, H. Bai, L. Zhang, C. Cui, S. Li, S. He, T. Cheng and B. Zhang, *Sci China Mater*, 2020, **63**, 2606-2612.
216. M. de Jesus Gálvez-Vázquez, P. Moreno-García, H. Xu, Y. Hou, H. Hu, I. Z. Montiel, A. V. Rudnev, S. Alinejad, V. Grozovski, B. J. Wiley, M. Arenz and P. Broekmann, *ACS Catalysis*, 2020, **10**, 13096-13108.
217. J. Jack, J. Lo, B. Donohue, P.-C. Maness and Z. Jason Ren, *Applied Energy*, 2020, **279**, 115725.
218. P. Mardle, S. Cassegrain, F. Habibzadeh, Z. Shi and S. Holdcroft, *The Journal of Physical Chemistry C*, 2021, **125**, 25446-25454.
219. H. Haspel and J. Gascon, *ACS Applied Energy Materials*, 2021, **4**, 8506-8516.
220. C. P. O'Brien, R. K. Miao, S. Liu, Y. Xu, G. Lee, A. Robb, J. E. Huang, K. Xie, K. Bertens, C. M. Gabardo, J. P. Edwards, C.-T. Dinh, E. H. Sargent and D. Sinton, *ACS Energy Letters*, 2021, **6**, 2952-2959.
221. D. Corral, J. T. Feaster, S. Sobhani, J. R. DeOtte, D. U. Lee, A. A. Wong, J. Hamilton, V. A. Beck, A. Sarkar, C. Hahn, T. F. Jaramillo, S. E. Baker and E. B. Duoss, *Energy &*

- Environmental Science*, 2021, **14**, 3064-3074.
222. R. Xia, J.-J. Lv, X. Ma and F. Jiao, *Journal of Catalysis*, 2021, **398**, 185-191.
223. A. Ozden, Y. Wang, F. Li, M. Luo, J. Sisler, A. Thevenon, A. Rosas-Hernández, T. Burdyny, Y. Lum and H. Yadegari, *Joule*, 2021, **5**, 706-719.
224. K. Yang, M. Li, S. Subramanian, M. A. Blommaert, W. A. Smith and T. Burdyny, *ACS Energy Letters*, 2021, **6**, 4291-4298.
225. J. Zou, C.-Y. Lee and G. G. Wallace, *ACS Sustainable Chemistry & Engineering*, 2021, **9**, 16394-16402.
226. B. Eriksson, T. Asset, F. Spanu, F. Lecoœur, M. Dupont, F. A. Garcés-Pineda, J. R. Galán-Mascarós, S. Cavaliere, J. Rozière and F. Jaouen, *Journal of the Electrochemical Society*, 2022, **169**, 034508.
227. K. Ye, G. Zhang, X.-Y. Ma, C. Deng, X. Huang, C. Yuan, G. Meng, W.-B. Cai and K. Jiang, *Energy & Environmental Science*, 2022, **15**, 749-759.
228. H. P. Duong, N.-H. Tran, G. Rousse, S. Zanna, M. W. Schreiber and M. Fontecave, *ACS Catalysis*, 2022, **12**, 10285-10293.
229. K. Xie, R. K. Miao, A. Ozden, S. Liu, Z. Chen, C.-T. Dinh, J. E. Huang, Q. Xu, C. M. Gabardo, G. Lee, J. P. Edwards, C. P. O'Brien, S. W. Boettcher, D. Sinton and E. H. Sargent, *Nature Communications*, 2022, **13**, 3609.
230. B. Siritanaratkul, M. Forster, F. Greenwell, P. K. Sharma, E. H. Yu and A. J. Cowan, *Journal of the American Chemical Society*, 2022, **144**, 7551-7556.
231. F. Huq, I. Sanjuán, S. Baha, M. Braun, A. Kostka, V. Chanda, J. R. C. Junqueira, N. Sikdar, A. Ludwig and C. Andronesco, *ChemElectroChem*, 2022, **9**, e202101279.
232. S. Ren, Z. Zhang, E. W. Lees, A. G. Fink, L. Melo, C. Hunt, D. J. Dvorak, W. Yu Wu, E. R. Grant and C. P. Berlinguette, *Chemistry – A European Journal*, 2022, **28**, e202200340.
233. N.-H. Tran, H. P. Duong, G. Rousse, S. Zanna, M. W. Schreiber and M. Fontecave, *ACS Applied Materials & Interfaces*, 2022, **14**, 31933-31941.
234. M. A. Blommaert, S. Subramanian, K. Yang, W. A. Smith and D. A. Vermaas, *ACS Applied Materials & Interfaces*, 2022, **14**, 557-563.
235. S. Overa, B. S. Crandall, B. Shrimant, D. Tian, B. H. Ko, H. Shin, C. Bae and F. Jiao, *Nature Catalysis*, 2022, **5**, 738-745.
236. K. Krause, J. K. Lee, C. Lee, H. W. Shafaque, P. J. Kim, K. F. Fahy, P. Shrestha, J. M. LaManna, E. Baltic, D. L. Jacobson, D. S. Hussey and A. Bazylak, *Journal of Power Sources*, 2022, **520**, 230879.
237. J. Disch, S. Ingenhoven and S. Vierrath, *Advanced Energy Materials*, 2023, **13**, 2301614.
238. M. Wang, Q. Zou, X. Dong, N. Xu, R. Shao, J. Ding, Y. Zhang and J. Qiao, *Green Energy & Environment*, 2023, **8**, 893-903.
239. P. Hauke, S. Brückner and P. Strasser, *ACS Sustainable Chemistry & Engineering*, 2023, **11**, 13628-13635.
240. K. Yang, N. Zhang, J. Yang, Z. Xu, J. Yan, D. Li and S. Liu, *Applied Catalysis B: Environmental*, 2023, **332**, 122718.
241. T. Möller, M. Filippi, S. Brückner, W. Ju and P. Strasser, *Nature Communications*, 2023, **14**, 5680.
242. Z. Liu, X. Lv, S. Kong, M. Liu, K. Liu, J. Zhang, B. Wu, Q. Zhang, Y. Tang, L. Qian, L. Zhang and G. Zheng, *Angewandte Chemie International Edition*, 2023, **62**, e202309319.
243. P. Mardle, A. Gangrade, T. Saatkamp, Z. Jiang, S. Cassegrain, N. Zhao, Z. Shi and S. Holdcroft, *ChemSusChem*, 2023, **16**, e202202376.
244. J. Wang, T. R. Willson, S. Brückner, D. K. Whelligan, C. Sun, L. Liang, X. Wang, P. Strasser, J. Varcoe and W. Ju, *Electrochimica Acta*, 2023, **461**, 142613.
245. C. A. Giron Rodriguez, B. Ó. Joensen, A. B. Moss, G. O. Larrazábal, D. K. Whelligan, B. Seger, J. R. Varcoe and T. R. Willson, *ACS Sustainable Chemistry & Engineering*, 2023, **11**, 1508-1517.



246. M. Wang, B. Xu, Q. Zou, X. Dong, R. Shao and J. Qiao, *Separation and Purification Technology*, 2023, **307**, 122792.
247. Q. Xu, A. Xu, S. Garg, A. B. Moss, I. Chorkendorff, T. Bligaard and B. Seger, *Angewandte Chemie International Edition*, 2023, **62**, e202214383.
248. L. Hoof, N. Thissen, K. Pellumbi, K. Junge Puring, D. Siegmund, A. K. Mechler and U.-P. Apfel, *Cell Reports Physical Science*, 2022, **3**, 100825.
249. M. Liu, H. Hu, Y. Kong, I. Z. Montiel, V. Kolivoška, A. V. Rudnev, Y. Hou, R. Erni, S. Vesztergom and P. Broekmann, *Applied Catalysis B: Environmental*, 2023, **335**, 122885.
